# Supplementary material
Source: ML conference proceedings conference paper supplement (https://proceedings.neurips.cc/paper_files/paper/2021/hash/4afa19649ae378da31a423bcd78a97c8-Abstract.html)
Supplement: Supplementary file 1 [file 4afa19649ae378da31a423bcd78a97c8-Supplemental.pdf]

## A Proof of Lemma 2.2

**Lemma A.1** (Concentration for heavy-tailed  $\beta$ -mixing sum, Lemma 2.2). *Let  $\{W_j\}_{j \geq 1}$  be a sequence of zero-mean real valued random variables satisfying conditions (a) and (c)-(ii) of Assumption 2.1, for some  $\eta_2 > 2$ . Then for any positive integer  $N$ ,  $0 \leq d_1 \leq 1$ , and  $d_2 \geq 0$ , and for any  $t > 1$ , we have,*

$$\mathbb{P} \left( \sup_{j \leq N} \left| \sum_{i=1}^j W_i \right| \geq t \right) \leq \frac{2^{\eta_2+3}}{(d_2 \log t)^{\frac{1-\eta_2}{\eta_1}}} \frac{N}{t^{(1+d_1(\eta_2-1))}} + 8 \frac{N}{t^{(1+c'd_2)}} + 2e^{-\frac{t^{2-2d_1}(d_2 \log t)^{1/\eta_1}}{9N}},$$

where  $c' > 0$  is a constant.

*Proof.* [Proof of Lemma 2.2] Let  $W_{i,M}$  denote the truncated random variable  $W_i$  such that  $W_{i,M} = \max(\min(W_i, M), -M)$ . Then define  $\Sigma_N := \sum_{i=1}^N W_i$ . Consider the partition of the samples into blocks of length  $A$ ,  $I_i = \{1 + (i-1)A, \dots, iA\}$  for  $i = 1, 2, \dots, 2\mu_1$  where  $\mu_1 = \lfloor N/(2A) \rfloor$ . Also let  $I_{2\mu_1+1} = \{2\mu_1 A + 1, \dots, N\}$ . Define for a finite set  $I$  of positive integers, define  $\Sigma_{N,M}(I) = \sum_{i \in I} W_{i,M}$ . Then we can write, for  $j \leq N$

$$\Sigma_j = \sum_{i=1}^j W_i \tag{28}$$

$$= \sum_{i=1}^j (W_i - W_{i,M}) + \sum_{i=1}^j W_{i,M} \tag{29}$$

$$= \sum_{i=1}^j (W_i - W_{i,M}) + \sum_{i \leq \lfloor j/A \rfloor} \Sigma_{N,M}(I_{2i}) + \sum_{i \leq \lfloor j/A \rfloor} \Sigma_{N,M}(I_{2i-1}) + \sum_{i=A\lfloor j/A \rfloor+1}^j W_{i,M}. \tag{30}$$

Then we have,

$$|\Sigma_j| \leq \sum_{i=1}^j |W_i - W_{i,M}| + \left| \sum_{i \leq \lfloor j/A \rfloor} \Sigma_{N,M}(I_{2i}) \right| + \left| \sum_{i \leq \lfloor j/A \rfloor} \Sigma_{N,M}(I_{2i-1}) \right| + 2AM \tag{31}$$

$$\sup_{j \leq N} |\Sigma_j| \leq \sum_{i=1}^N |W_i - W_{i,M}| + \sup_{j \leq N} \left| \sum_{i \leq \lfloor j/A \rfloor} \Sigma_{N,M}(I_{2i}) \right| + \sup_{j \leq N} \left| \sum_{i \leq \lfloor j/A \rfloor} \Sigma_{N,M}(I_{2i-1}) \right| + 2AM. \tag{32}$$

Now we will establish concentration for each of the terms in the above expression. Using Markov's inequality,

$$\begin{aligned} \mathbb{P} \left( \sum_{i=1}^N |W_i - W_{i,M}| \geq t \right) &\leq \frac{1}{t} \sum_{i=1}^N \mathbb{E} [|W_i - W_{i,M}|] \leq \frac{2}{t} \sum_{i=1}^N \int_M^\infty \mathbb{P}(|W_i| \geq x) dx \\ &\leq \frac{2N}{t} \int_M^\infty x^{-\eta_2} dx = \frac{2N}{t(\eta_2 - 1)} M^{1-\eta_2}. \end{aligned} \tag{33}$$

Using Lemma 5 of [DP04], we get independent random variables  $\{\Sigma_{N,M}^*(I_{2i})\}_{1 \leq i \leq \mu_1}$ , where  $\Sigma_{N,M}^*(I_{2i})$  has the same distribution as  $\Sigma_{N,M}(I_{2i})$ , such that,

$$\mathbb{E} [|\Sigma_{N,M}(I_{2i}) - \Sigma_{N,M}^*(I_{2i})|] \leq A\tau(A). \tag{34}$$

Then, using Markov's inequality we have,

$$\begin{aligned} &\mathbb{P} \left( \sup_{j \leq N} \left| \sum_{i \leq \lfloor j/A \rfloor} \Sigma_{N,M}(I_{2i}) \right| \geq t \right) \\ &\leq \mathbb{P} \left( \sup_{j \leq N} \left| \sum_{i \leq \lfloor j/A \rfloor} (\Sigma_{N,M}(I_{2i}) - \Sigma_{N,M}^*(I_{2i})) \right| + \sup_{j \leq N} \left| \sum_{i \leq \lfloor j/A \rfloor} \Sigma_{N,M}^*(I_{2i}) \right| \geq t \right) \end{aligned}$$

$$\begin{aligned}
&\leq \mathbb{P} \left( \sup_{j \leq N} \left| \sum_{i \leq [j/A]} (\Sigma_{N,M}(I_{2i}) - \Sigma_{N,M}^*(I_{2i})) \right| \geq \frac{t}{2} \right) + \mathbb{P} \left( \sup_{j \leq N} \left| \sum_{i \leq [j/A]} \Sigma_{N,M}^*(I_{2i}) \right| \geq \frac{t}{2} \right) \\
&\leq \frac{2\mathbb{E} \left[ \sup_{j \leq N} \left| \sum_{i \leq [j/A]} (\Sigma_{N,M}(I_{2i}) - \Sigma_{N,M}^*(I_{2i})) \right| \right]}{t} + \mathbb{P} \left( \sup_{j \leq N} \left| \sum_{i \leq [j/A]} \Sigma_{N,M}^*(I_{2i}) \right| \geq \frac{t}{2} \right) \\
&\leq \frac{2\mathbb{E} \left[ \sup_{j \leq N} \sum_{i \leq \mu_1} |\Sigma_{N,M}(I_{2i}) - \Sigma_{N,M}^*(I_{2i})| \right]}{t} + \mathbb{P} \left( \sup_{j \leq N} \left| \sum_{i \leq [j/A]} \Sigma_{N,M}^*(I_{2i}) \right| \geq \frac{t}{2} \right) \\
&\leq \frac{2A\mu_1\tau(A)}{t} + \mathbb{P} \left( \sup_{j \leq N} \left| \sum_{i \leq [j/A]} \Sigma_{N,M}^*(I_{2i}) \right| \geq \frac{t}{2} \right).
\end{aligned}$$

The same results holds for  $\{\Sigma_{N,M}^*(I_{2i-1})\}_{i=1,2,\dots,k}$ . So for any  $t \geq 2AM$ , we have,

$$\begin{aligned}
\mathbb{P} \left( \sup_{j \leq N} |\Sigma_j| \geq 6t \right) &\leq \frac{2N}{t(\eta_2 - 1)} M^{1-\eta_2} + \frac{4A\mu_1\tau(A)}{t} + \mathbb{P} \left( \sup_{j \leq N} \left| \sum_{i \leq [j/A]} \Sigma_{N,M}^*(I_{2i}) \right| \geq t \right) \\
&\quad + \mathbb{P} \left( \sup_{j \leq N} \left| \sum_{i \leq [j/A]} \Sigma_{N,M}^*(I_{2i-1}) \right| \geq t \right). \tag{35}
\end{aligned}$$

Now, for  $\lambda > 0$

$$\begin{aligned}
\mathbb{P} \left( \sup_{j \leq N} \left| \sum_{i \leq [j/A]} \Sigma_{N,M}^*(I_{2i}) \right| \geq t \right) &\leq e^{-\lambda t} \mathbb{E} \left[ \exp \left( \lambda \sup_{j \leq N} \left| \sum_{i \leq [j/A]} \Sigma_{N,M}^*(I_{2i}) \right| \right) \right] \\
&\leq e^{-\lambda t} \mathbb{E} \left[ \exp \left( \lambda \sum_{i \leq \mu_1} |\Sigma_{N,M}^*(I_{2i})| \right) \right] \\
&\leq e^{-\lambda t} \prod_{i=1}^{\mu_1} \mathbb{E} [\exp(\lambda |\Sigma_{N,M}^*(I_{2i})|)].
\end{aligned}$$

We have  $|\Sigma_{N,M}(I_{2i})| \leq AM$ . So  $|\Sigma_{N,M}(I_{2i})|$  is a sub-gaussian random variable and consequently,

$$\mathbb{P} \left( \sup_{j \leq N} \left| \sum_{i \leq [j/A]} \Sigma_{N,M}^*(I_{2i}) \right| \geq t \right) \leq e^{-\lambda t} e^{\frac{\lambda^2 \mu_1 A^2 M^2}{2}}.$$

Optimizing over  $\lambda > 0$  we have,

$$\mathbb{P} \left( \sup_{j \leq N} \left| \sum_{i \leq [j/A]} \Sigma_{N,M}^*(I_{2i}) \right| \geq t \right) \leq e^{-\frac{t^2}{2\mu_1 A^2 M^2}}. \tag{36}$$

Similarly, we also obtain

$$\mathbb{P} \left( \sup_{j \leq N} \left| \sum_{i \leq [j/A]} \Sigma_{N,M}^*(I_{2i-1}) \right| \geq t \right) \leq e^{-\frac{t^2}{2\mu_1 A^2 M^2}}. \tag{37}$$

From (35), (36), and (37) we have,

$$\mathbb{P} \left( \sup_{j \leq N} |\Sigma_j| \geq 6t \right) \leq \frac{2N}{t(\eta_2 - 1)} M^{1-\eta_2} + \frac{4A\mu_1\tau(A)}{t} + 2e^{-\frac{t^2}{2\mu_1 A^2 M^2}}.$$

Condition (a) in Assumption 2.1 implies that the process  $\{Z_i\}_{i=-\infty}^{\infty}$  is exponentially  $\tau$ -mixing [CG14], i.e., for a constant  $c' > 0$ ,  $\tau(k) \leq e^{-c'k^{\eta_1}}$ . Then we have

$$\mathbb{P} \left( \sup_{j \leq N} |\Sigma_j| \geq t \right) \leq \frac{12N}{t(\eta_2 - 1)} M^{1-\eta_2} + \frac{24A\mu_1 \exp(-c'A^{\eta_1})}{t} + 2e^{-\frac{t^2}{72\mu_1 A^2 M^2}}.$$

As  $2A\mu_1 \leq N \leq 3A\mu_1$  and  $\eta_2 > 2$ ,

$$\mathbb{P}\left(\sup_{j \leq N} |\Sigma_j| \geq t\right) \leq \frac{12NM^{1-\eta_2}}{t} + \frac{8N \exp(-c' A^{\eta_1})}{t} + 2e^{-\frac{t^2}{36NAM^2}}.$$

Now choosing

$$M = \frac{t^{d_1}}{2(d_2 \log t)^{\frac{1}{\eta_1}}}, \quad A = (d_2 \log t)^{\frac{1}{\eta_1}}, \quad 0 \leq d_1 \leq 1, \quad d_2 \geq 0, \quad (38)$$

we have,  $2AM \leq t$ , and

$$\mathbb{P}\left(\sup_{j \leq N} |\Sigma_j| \geq t\right) \leq \frac{2^{\eta_2+3}}{(d_2 \log t)^{\frac{1-\eta_2}{\eta_1}}} N t^{-(1+d_1(\eta_2-1))} + 8N t^{-(1+d_2c')} + 2e^{-\frac{t^{2-2d_1}(d_2 \log t)^{1/\eta_1}}{9N}}.$$

■

## B Proofs of Section 3

### B.1 Proofs for squared error loss

Similar to the decomposition (1), for squared loss we have

$$P_N L_f = \frac{1}{N} \sum_{i=1}^N (f - f^*)^2(X_i) + \frac{2}{N} \sum_{i=1}^N \xi_i (f - f^*)(X_i),$$

Since  $\mathcal{F}$  is convex, we also have

$$\mathbb{E} [\xi (f - f^*)(X)] \geq 0.$$

Then,

$$P_N L_f \geq \frac{1}{N} \sum_{i=1}^N (f - f^*)^2(X_i) + \frac{2}{N} \sum_{i=1}^N (\xi_i (f - f^*)(X_i) - \mathbb{E} [\xi_i (f - f^*)(X_i)]). \quad (39)$$

Now our goal is to establish a lower bound (Lemma B.1) on the first term of the RHS of (39), and a two-sided bound ((67) and (69)) on the second term when  $\|f - f^*\|_{L_2}$  is large. Combining these bounds we will show that if  $\|f - f^*\|_{L_2}$  is large then  $P_N L_f > 0$  which implies  $f$  cannot be a minimizer of empirical risk because for the minimizer  $\hat{f}$  we have  $P_N L_{\hat{f}} \leq 0$ .

**Lemma B.1.** *Let Condition (a) and (b) of Assumption 2.1 be true. Given  $f^* \in \mathcal{F}$ , set  $\mathcal{H} = \mathcal{F} - f^*$ . Then, for every  $\rho > \omega_\mu(\mathcal{H}, \tau Q_{\mathcal{H}}(2\tau)/16)$ , with probability at least  $\mathcal{P}_1$ , if  $\|f - f^*\|_{L_2} \geq \rho$ , we have,*

$$|\{i : |(f - f^*)(X_i)| \geq \tau \|f - f^*\|_{L_2}\}| \geq \frac{NQ_{\mathcal{H}}(2\tau)}{4}. \quad (40)$$

The proof of Lemma B.1 follows easily by combining the results of Lemma B.2, and Corollary B.1 which we state next.

**Lemma B.2.** *Let  $S(L_2)$  be the  $L_2(\pi)$  unit sphere and let  $\mathcal{H} \subset S(L_2)$ . Consider the partition in (6). Under conditions (a) and (b) of Assumption 2.1, by setting  $\mu = \frac{NQ_{\mathcal{H}}(2\tau)c^{\frac{1}{\eta_1}}}{4\mathcal{G}(N)^{\frac{1}{\eta_1}}}$  for some  $\mathcal{G}(N) \leq \frac{cQ_{\mathcal{H}}(2\tau)^{\eta_1} N^{\eta_1}}{4^{\eta_1}}$ , if,*

$$\mathfrak{R}_\mu(\mathcal{H}) \leq \frac{\tau Q_{\mathcal{H}}(2\tau)N}{16\mu}, \quad (41)$$

then with probability at least  $1 - 2\exp\left(-\frac{NQ_{\mathcal{H}}(2\tau)^3}{2(4-Q_{\mathcal{H}}(2\tau))^2} \left(\frac{c}{\mathcal{G}(N)}\right)^{\frac{1}{\eta_1}}\right) - \frac{NQ_{\mathcal{H}}(2\tau)c^{\frac{1}{\eta_1}}}{4\mathcal{G}(N)^{\frac{1}{\eta_1}}} \exp(-\mathcal{G}(N))$ , we have

$$\inf_{h \in \mathcal{H}} |\{i : |h(X_i)| \geq \tau\}| \geq \frac{NQ_{\mathcal{H}}(2\tau)}{4}. \quad (42)$$

**Remark 5.** We have the following illustrative instantiations of Lemma B.2:

1. If one sets  $\mathcal{G}(N) = k \log N \leq \frac{cQ_{\mathcal{H}}(2\tau)^{\eta_1} N^{\eta_1}}{4^{\eta_1}}$ , then the statement of Lemma B.2 holds as long as,

$$\mathfrak{R}_{\mu}(\mathcal{H}) \leq \frac{\tau(k \log N)^{\frac{1}{\eta_1}}}{4c^{\frac{1}{\eta_1}}}, \quad (43)$$

with probability at least

$$1 - 2\exp\left(-\frac{NQ_{\mathcal{H}}(2\tau)^3}{2(4 - Q_{\mathcal{H}}(2\tau))^2} \left(\frac{c}{k \log N}\right)^{\frac{1}{\eta_1}}\right) - \frac{N^{1-k} Q_{\mathcal{H}}(2\tau) c^{\frac{1}{\eta_1}}}{4(k \log N)^{\frac{1}{\eta_1}}}.$$

2. If one sets  $\mathcal{G}(N) = N^r \leq \frac{cQ_{\mathcal{H}}(2\tau)^{\eta_1} N^{\eta_1}}{4^{\eta_1}}$ , for some  $0 < r < \eta_1$ , then the statement of Lemma B.2 holds as long as,

$$\mathfrak{R}_{\mu}(\mathcal{H}) \leq \frac{\tau(N)^{\frac{r}{\eta_1}}}{4c^{\frac{1}{\eta_1}}}, \quad (44)$$

with probability at least

$$1 - 2\exp\left(-\frac{NQ_{\mathcal{H}}(2\tau)^3}{2(4 - Q_{\mathcal{H}}(2\tau))^2} \left(\frac{c}{N^r}\right)^{\frac{1}{\eta_1}}\right) - \frac{NQ_{\mathcal{H}}(2\tau) c^{\frac{1}{\eta_1}}}{4(N)^{\frac{r}{\eta_1}}} \exp(-N^r).$$

*Proof.* [Proof of Lemma B.2] Let  $\psi_u : \mathbb{R}_+ \rightarrow [0, 1]$  be the function

$$\psi_u(t) = \begin{cases} 1 & t \geq 2u, \\ \frac{t}{u} - 1 & u \leq t \leq 2u \\ 0 & t < u \end{cases}$$

Similar to (6), let us define sequences of i.i.d blocks  $\{\tilde{Z}_i^{(a)}\}_{i=1}^{\mu}$ , and  $\{\tilde{Z}_i^{(b)}\}_{i=1}^{\mu}$  where the samples within each block are assumed to be drawn from the same  $\beta$ -mixing distribution of  $\{Z_i^{(a)}\}_{i=1}^{\mu}$ , and  $\{Z_i^{(b)}\}_{i=1}^{\mu}$ . Let  $\tilde{S}_a = (\tilde{Z}_1^{(a)}, \dots, \tilde{Z}_{\mu}^{(a)})$ , and  $\tilde{S}_b = (\tilde{Z}_1^{(b)}, \dots, \tilde{Z}_{\mu}^{(b)})$ . Now let us concentrate on the term  $|P_N \psi_u(|h|) - P \psi_u(|h|)|$ .

$$\begin{aligned} & |P_N \psi_u(|h|) - P \psi_u(|h|)| \\ & \leq \left| \frac{1}{N} \sum_{i=1}^N \psi_u(h(|X_i|)) - P \psi_u(|h|) \right| \\ & \leq \left| \frac{1}{N} \sum_{i=1}^{\mu} \sum_{j=1}^a \psi_u(h(|X_{(i-1)(a+b)+j}|)) + \frac{1}{N} \sum_{i=1}^{\mu} \sum_{j=1}^b \psi_u(h(|X_{(i-1)(a+b)+a+j}|)) - P \psi_u(|h|) \right| \\ & \leq \left| \frac{1}{N} \sum_{i=1}^{\mu} \sum_{j=1}^a (\psi_u(h(|X_{(i-1)(a+b)+j}|)) - P \psi_u(|h|)) \right| + \frac{b\mu}{N}. \end{aligned} \quad (45)$$

Using (45) and Corollary 2.7 of [Yu94], for some  $a, b, \mu$  to be chosen later such that  $(a+b)\mu = N$  we have,

$$\mathbb{P}\left(|P_N \psi_u(|h|) - P \psi_u(|h|)| \geq t + \frac{b\mu}{N}\right) \quad (46)$$

$$\leq \mathbb{P}\left(\left|\frac{1}{N} \sum_{i=1}^{\mu} \sum_{j=1}^a (\psi_u(h(|X_{(i-1)(a+b)+j}|)) - P \psi_u(|h|))\right| + \frac{b\mu}{N} \geq t + \frac{b\mu}{N}\right) \quad (47)$$

$$= \mathbb{E}\left[\mathbb{1}\left(\left|\frac{1}{N} \sum_{i=1}^{\mu} \sum_{j=1}^a (\psi_u(h(|X_{(i-1)(a+b)+j}|)) - P \psi_u(|h|))\right| \geq t\right)\right] \quad (48)$$

$$\leq \mathbb{E} \left[ \mathbb{1} \left( \left| \frac{1}{N} \sum_{i=1}^{\mu} \sum_{j=1}^a \left( \psi_u(h(|\tilde{X}_{(i-1)(a+b)+j}|)) - P\psi_u(|h|) \right) \right| \geq t \right) \right] + (\mu - 1)\beta(b) \quad (49)$$

$$= \mathbb{P} \left( \left| \frac{1}{N} \sum_{i=1}^{\mu} \sum_{j=1}^a \left( \psi_u(h(|\tilde{X}_{(i-1)(a+b)+j}|)) - P\psi_u(|h|) \right) \right| \geq t \right) + (\mu - 1)\beta(b) \quad (50)$$

$$= \mathbb{P} \left( \left| \frac{1}{\mu} \sum_{i=1}^{\mu} \tilde{\psi}(\tilde{Z}_i^{(a)}) \right| \geq \frac{Nt}{\mu} \right) + (\mu - 1)\beta(b), \quad (51)$$

where

$$\tilde{\psi}(\tilde{Z}_i^{(a)}) = \sum_{j=1}^a \left( \psi_u(h(|\tilde{X}_{(i-1)(a+b)+j}|)) - P\psi_u(|h|) \right),$$

and  $\mathbb{1}(\cdot)$  is the indicator function. Observe that the function

$$W(\tilde{Z}_1^{(a)}, \tilde{Z}_2^{(a)}, \dots, \tilde{Z}_\mu^{(a)}) = \mu^{-1} \sum_{i=1}^{\mu} \tilde{\psi}(\tilde{Z}_i^{(a)})$$

has bounded difference with coefficient  $2a/\mu$ . Then using Mcdiarmid's bounded-difference inequality on  $W(\tilde{Z}_1^{(a)}, \tilde{Z}_2^{(a)}, \dots, \tilde{Z}_\mu^{(a)})$  we get,

$$\mathbb{P} \left( \left| \frac{1}{\mu} \sum_{i=1}^{\mu} \tilde{\psi}(\tilde{Z}_i^{(a)}) \right| \geq \frac{Nt}{\mu} \right) \leq 2\exp \left( -\frac{N^2 t^2}{2a^2 \mu} \right). \quad (52)$$

Combining (51), and (52), we get

$$\mathbb{P} \left( |P_N \psi_u(|h|) - P\psi_u(|h|)| \geq t + \frac{b\mu}{N} \right) \leq 2\exp \left( -\frac{N^2 t^2}{2a^2 \mu} \right) + (\mu - 1)\beta(b),$$

which implies

$$\begin{aligned} & \mathbb{P} \left( |P_N \psi_u(|h|) - P\psi_u(|h|)| \geq \frac{4\mu}{Nu} \mathbb{R}_\mu(\mathcal{H}) + \frac{b\mu}{N} + \frac{t}{\sqrt{N}} \right) \\ & \leq 2\exp \left( -\frac{N^2 \left( \frac{4\mu}{Nu} \mathbb{R}_\mu(\mathcal{H}) + \frac{t}{\sqrt{N}} \right)^2}{2a^2 \mu} \right) + (\mu - 1)\beta(b). \end{aligned}$$

Also note that, for any  $t$ , we have  $|P_N \psi_u(|h|) - P\psi_u(|h|)| \geq t$  which implies that we also have  $\sup_{h \in \mathcal{H}} |P_N \psi_u(|h|) - P\psi_u(|h|)| \geq t$ . Hence,

$$\begin{aligned} & \mathbb{P} \left( \sup_{h \in \mathcal{H}} |P_N \psi_u(|h|) - P\psi_u(|h|)| \geq \frac{4\mu}{Nu} \mathbb{R}_\mu(\mathcal{H}) + \frac{b\mu}{N} + \frac{t}{\sqrt{N}} \right) \\ & \leq 2\exp \left( -\frac{N^2 \left( \frac{4\mu}{Nu} \mathbb{R}_\mu(\mathcal{H}) + \frac{t}{\sqrt{N}} \right)^2}{2a^2 \mu} \right) + (\mu - 1)\beta(b). \end{aligned} \quad (53)$$

In other words, with probability at least  $1 - 2\exp \left( -\frac{N^2 \left( \frac{4\mu}{Nu} \mathbb{R}_\mu(\mathcal{H}) + \frac{t}{\sqrt{N}} \right)^2}{2a^2 \mu} \right) - (\mu - 1)\beta(b)$ , we have

$$\sup_{h \in \mathcal{H}} |P_N \psi_u(|h|) - P\psi_u(|h|)| \leq \frac{4\mu}{Nu} \mathbb{R}_\mu(\mathcal{H}) + \frac{b\mu}{N} + \frac{t}{\sqrt{N}}. \quad (54)$$

Hence, we have

$$P_N \mathbf{1}_{\{|h| \geq u\}} \geq \inf_{h \in \mathcal{H}} \mathbb{P}(|h| \geq 2u) - \sup_{h \in \mathcal{H}} |P_N \psi_u(|h|) - P\psi_u(|h|)|. \quad (55)$$

So, combining (53), and (55), with probability at least  $1 - 2\exp\left(-\frac{N^2\left(\frac{4\mu}{N^2}\mathbb{R}_\mu(\mathcal{H}) + \frac{t}{\sqrt{N}}\right)^2}{2a^2\mu}\right) - (\mu - 1)\beta(b)$  we have

$$P_N \mathbf{1}_{\{|h| \geq u\}} \geq \inf_{h \in \mathcal{H}} \mathbb{P}(|h| \geq 2u) - \frac{4\mu}{Nu} \mathbb{R}_\mu(\mathcal{H}) - \frac{b\mu}{N} - \frac{t}{\sqrt{N}}.$$

Now, setting

$$u = \tau \quad t = \frac{\sqrt{N}Q_{\mathcal{H}}}{4} \quad a = \frac{(4 - Q_{\mathcal{H}}(2\tau))(\mathcal{G}(N))^{\frac{1}{\eta_1}}}{Q_{\mathcal{H}}(2\tau)c^{\frac{1}{\eta_1}}} \quad b = \left(\frac{\mathcal{G}(N)}{c}\right)^{\frac{1}{\eta_1}} \quad \mu = \frac{NQ_{\mathcal{H}}(2\tau)c^{\frac{1}{\eta_1}}}{4\mathcal{G}(N)^{\frac{1}{\eta_1}}}, \quad (56)$$

and using the condition  $\mathcal{G}(N) > c$ , we get, with probability at least

$$1 - 2\exp\left(-\frac{NQ_{\mathcal{H}}(2\tau)^3}{2(4 - Q_{\mathcal{H}}(2\tau))^2} \left(\frac{c}{\mathcal{G}(N)}\right)^{\frac{1}{\eta_1}}\right) - \frac{NQ_{\mathcal{H}}(2\tau)c^{\frac{1}{\eta_1}}}{4\mathcal{G}(N)^{\frac{1}{\eta_1}}} \exp(-\mathcal{G}(N)),$$

we have

$$P_N \mathbf{1}_{\{|h| \geq u\}} \geq \frac{Q_{\mathcal{H}}(2\tau)}{4}. \quad \blacksquare$$

**Corollary B.1.** *Let Condition (a) and (b) of Assumption 2.1 be true. Let  $\mathcal{H}$  be star-shaped around 0 and assume that there is some  $\tau > 0$  for which  $Q_{\mathcal{H}}(2\tau) > 0$ . Then for every  $\rho > \omega_\mu(\mathcal{H}, \tau Q_{\mathcal{H}}(2\tau)/16)$ , with probability at least*

$$\mathcal{P}_1 := 1 - 2\exp\left(-\frac{NQ_{\mathcal{H}}(2\tau)^3}{2(4 - Q_{\mathcal{H}}(2\tau))^2} \left(\frac{c}{\mathcal{G}(N)}\right)^{\frac{1}{\eta_1}}\right) - \frac{NQ_{\mathcal{H}}(2\tau)c^{\frac{1}{\eta_1}}}{4\mathcal{G}(N)^{\frac{1}{\eta_1}}} \exp(-\mathcal{G}(N)),$$

for every  $h \in \mathcal{H}$  that satisfies  $\|h\|_{L_2} \geq \rho$ ,

$$|\{i : |h(X_i)| \geq \tau \|h\|_{L_2}\}| \geq N \frac{Q_{\mathcal{H}}(2\tau)}{4}. \quad (57)$$

*Proof.* [Proof of Corollary B.1] Let  $\rho > \omega_\mu(\mathcal{H}, \tau Q_{\mathcal{H}}(2\tau)/16)$  and as  $\mathcal{H}$  is star-shaped around 0,

$$\mathfrak{R}_\mu(\mathcal{H} \cap \rho\mathcal{D}) \leq \frac{\tau Q_{\mathcal{H}}(2\tau)}{16} \rho. \quad (58)$$

Consider the set,

$$V = \{h/\rho : h \in \mathcal{H} \cap \rho S(L_2)\} \subset S(L_2). \quad (59)$$

Clearly,  $Q_V(2\tau) \geq Q_{\mathcal{H}}(2\tau)$  and

$$\mathfrak{R}_\mu(V) = \mathbb{E} \left[ \sup_{h \in \mathcal{H} \cap \rho S(L_2)} \left| \frac{1}{\mu} \sum_{i=1}^{\mu} \epsilon_i \frac{h(\tilde{X}_i)}{\rho} \right| \right] \leq \frac{\tau Q_{\mathcal{H}}(2\tau)}{16} \leq \frac{\tau Q_V(2\tau)}{16}. \quad (60)$$

Using Lemma B.2 on the set  $V$ , we get with probability at least  $\mathcal{P}_1$ , for every  $v \in V$

$$\inf_{h \in \mathcal{H}} |\{i : |v(X_i)| \geq \tau\}| \geq \frac{NQ_V(2\tau)}{4} \geq \frac{NQ_{\mathcal{H}}(2\tau)}{4}.$$

Now for any  $h$  with  $\|h\|_{L_2} \geq \rho$ , since  $\mathcal{H}$  is star-shaped around 0, we have  $(\rho/\|h\|_{L_2})h \in \mathcal{H} \cap \rho S(L_2)$  which implies,  $h/\|h\|_{L_2} \in V$ . So we have (57).  $\blacksquare$

**Theorem B.1** (Restatement of Theorem 3.1). *Consider the LS-ERM procedure. For  $\tau_0 < \tau^2 Q_{\mathcal{H}}(2\tau)/8$ , setting  $\mu = \frac{N^r Q_{\mathcal{H}}(2\tau)c^{\frac{1}{\eta_1}}}{4}$ , for some constants  $c, c' > 0$ , and  $0 < r < 1$ , we have, for any  $N \geq 4$ ,*

1. under condition (a), (b), (c)-(i), and (d) of Assumption 2.1, for  $0 < \iota < \frac{1}{4}$ ,

$$\left( \int (\hat{f} - f^*)^2 d\pi \right)^{\frac{1}{2}} = \|\hat{f} - f^*\|_{L_2} \leq \max \left\{ N^{-\frac{1}{4} + \iota}, \omega_\mu(\mathcal{F} - \mathcal{F}, \tau Q_{\mathcal{F} - \mathcal{F}}(2\tau)/16) \right\} \quad (61)$$

with probability at least

$$1 - 2 \exp \left( -\frac{N^r Q_{\mathcal{H}}(2\tau)^3 c^{\frac{1}{\eta_1}}}{2(4 - Q_{\mathcal{H}}(2\tau))^2} \right) - \frac{N^r Q_{\mathcal{H}}(2\tau) c^{\frac{1}{\eta_1}}}{4} \exp(-N^{(1-r)\eta_1}) - N \exp \left( -\frac{(N^{\frac{1}{2} + 2\iota} \tau_0)^\eta}{C_1} \right) \\ - \exp \left( -\frac{N^{1+4\iota} \tau_0^2}{C_2(1 + NV)} \right) - \exp \left( -\frac{N^{4\iota} \tau_0^2}{C_3} \exp \left( (1 - \eta)^\eta \frac{(N^{\frac{1}{2} + 2\iota} \tau_0)^{\eta(1-\eta)}}{C_4 2^\eta} \right) \right), \quad (62)$$

where  $V$  is defined in (8) and  $C_1, C_2, C_3$  are some positive constants.

2. under condition (a), (b), and (c)-(ii) of Assumption 2.1, for  $0 < \iota < (1 - 1/\eta_2)/4$ ,

$$\|\hat{f} - f^*\|_{L_2} \leq \max \left\{ N^{-\frac{1}{4} \left(1 - \frac{1}{\eta_2}\right) + \iota}, \omega_\mu(\mathcal{F} - \mathcal{F}, \tau Q_{\mathcal{F} - \mathcal{F}}(2\tau)/16) \right\} \quad (63)$$

with probability at least

$$1 - 2 \exp \left( -\frac{N^r Q_{\mathcal{H}}(2\tau)^3 c^{\frac{1}{\eta_1}}}{2(4 - Q_{\mathcal{H}}(2\tau))^2} \right) - \frac{N^r Q_{\mathcal{H}}(2\tau) c^{\frac{1}{\eta_1}}}{4} \exp(-N^{(1-r)\eta_1}) - 8\tau_0^{-\frac{2\eta_2}{1+\eta_2}} N^{-\frac{4\iota\eta_2}{1+\eta_2}} \\ - \frac{2^{\eta_2+3} c^{\frac{1-\eta_2}{\eta_1}} \tau_0^{-\frac{2\eta_2}{1+\eta_2}}}{\left( \log \left( \tau_0 N^{\frac{1}{2} + \frac{1}{2\eta_2} + 2\iota} \right) / 2 \right)^{\frac{1-\eta_2}{\eta_1}}} N^{-\frac{4\iota\eta_2}{1+\eta_2}} - 2e^{-\frac{\tau_0^{\frac{2\eta_2}{1+\eta_2}} \left( \log \left( \tau_0 N^{\frac{1}{2} + \frac{1}{2\eta_2} + 2\iota} \right) / 2 \right)^{1/\eta_1}}{9e^{1/\eta_1}}} N^{-\frac{4\iota\eta_2}{1+\eta_2}} \quad (64)$$

*Proof.* [Proof of Theorem B.1] We first prove **Part 1**. We will denote the class  $\mathcal{F} - f^*$  by  $\mathcal{H}$ . From Lemma B.2 it follows that if  $\rho > \omega_\mu(\mathcal{H}, \tau Q_{\mathcal{F} - \mathcal{F}}(2\tau)/16)$ , then with probability at least

$$\mathcal{P}_1 = 1 - 2 \exp \left( -\frac{N Q_{\mathcal{H}}(2\tau)^3}{2(4 - Q_{\mathcal{H}}(2\tau))^2} \left( \frac{c}{\mathcal{G}(N)} \right)^{\frac{1}{\eta_1}} \right) - \frac{N Q_{\mathcal{H}}(2\tau) c^{\frac{1}{\eta_1}}}{4 \mathcal{G}(N)^{\frac{1}{\eta_1}}} \exp(-\mathcal{G}(N)),$$

for every  $f \in \mathcal{F}$  that satisfies  $\|f - f^*\|_{L_2} \geq \rho$ ,

$$\frac{1}{N} \sum_{i=1}^N (f - f^*)^2(X_i) \geq \frac{\tau^2 \|f - f^*\|_{L_2}^2 Q_{\mathcal{H}}(2\tau)}{4} \quad (65)$$

So, with probability at least  $\mathcal{P}_1$ , for every  $f \in \mathcal{F}$  that satisfies  $\|f - f^*\|_{L_2} \geq \rho$ ,

$$P_N \mathcal{L}_f \geq 2 \left( \frac{1}{N} \sum_{i=1}^N \xi_i(f - f^*)(X_i) - \mathbb{E} [\xi(f - f^*)] \right) + \frac{\tau^2 \|f - f^*\|_{L_2}^2 Q_{\mathcal{H}}(2\tau)}{4}. \quad (66)$$

When  $\|f - f^*\|_{L_2} \geq \mathcal{A}(N) > 2(N\tau_0)^{-1/2}$ , we have  $\log(N\tau_0 \|f - f^*\|_{L_2}^2) \leq 2(N\tau_0 \|f - f^*\|_{L_2}^2)^{(1-\eta)/2} / (1 - \eta)$ . Under Conditions (a), (c)-(i), and (d) of Assumption 2.1, using Lemma 2.1, we get

$$\mathbb{P} \left( \left| \frac{1}{N} \sum_{i=1}^N \xi_i(f - f^*)(X_i) - \mathbb{E} [\xi(f - f^*)] \right| \geq \tau_0 \|f - f^*\|_{L_2}^2 \right) \\ \leq N \exp \left( -\frac{(N\tau_0 \|f - f^*\|_{L_2}^2)^\eta}{C_1} \right) + \exp \left( -\frac{N^2 \tau_0^2 \|f - f^*\|_{L_2}^4}{C_2(1 + NV)} \right)$$

$$\begin{aligned}
& + \exp\left(-\frac{N\tau_0^2\|f-f^*\|_{L_2}^4}{C_3}\exp\left(\frac{(N\tau_0\|f-f^*\|_{L_2}^2)^{\eta(1-\eta)}}{C_4(\log(N\tau_0\|f-f^*\|_{L_2}^2))^\eta}\right)\right) \\
& \leq N\exp\left(-\frac{(N\tau_0\|f-f^*\|_{L_2}^2)^\eta}{C_1}\right) + \exp\left(-\frac{N^2\tau_0^2\|f-f^*\|_{L_2}^4}{C_2(1+NV)}\right) \\
& + \exp\left(-\frac{N\tau_0^2\|f-f^*\|_{L_2}^4}{C_3}\exp\left(\frac{(1-\eta)^\eta(N\tau_0\|f-f^*\|_{L_2}^2)^{\frac{\eta(1-\eta)}{2}}}{C_42^\eta}\right)\right) \\
& \leq N\exp\left(-\frac{(N\tau_0\mathcal{A}(N))^2^\eta}{C_1}\right) + \exp\left(-\frac{N^2\tau_0^2\mathcal{A}(N)^4}{C_2(1+NV)}\right) \\
& + \exp\left(-\frac{N\tau_0^2\mathcal{A}(N)^4}{C_3}\exp\left(\frac{(1-\eta)^\eta(N\tau_0\mathcal{A}(N))^2\frac{\eta(1-\eta)}{2}}{C_42^\eta}\right)\right) \equiv \mathcal{P}_2, \tag{67}
\end{aligned}$$

where

$$V \leq \mathbb{E}\left[(\xi_1(f-f^*)(X_1))^2\right] + 4\sum_{i \geq 0} \mathbb{E}\left[B_i(\xi_1(f-f^*)(X_1))^2\right],$$

$\{B_i\}$  is some sequence such that  $B_i \in [0, 1]$ ,  $\mathbb{E}[B_i] \leq \beta(i)$  and  $C_1, C_2, C_3$  are constants which depend on  $c, \eta, \eta_1, \eta_2$ . Observe that,

$$\begin{aligned}
V & \leq \mathbb{E}\left[(\xi_1(f-f^*)(X_1))^2\right] + 4\sum_{i \geq 0} \mathbb{E}\left[B_i(\xi_1(f-f^*)(X_1))^2\right] \\
& \leq \mathbb{E}\left[(\xi_1(f-f^*)(X_1))^2\right] + 4\sum_{i \geq 0} \sqrt{\mathbb{E}[B_i^2] \mathbb{E}\left[(\xi_1(f-f^*)(X_1))^4\right]} \\
& \leq \mathbb{E}\left[(\xi_1(f-f^*)(X_1))^2\right] + 4\sqrt{\mathbb{E}\left[(\xi_1(f-f^*)(X_1))^4\right]} \sum_{i \geq 0} \sqrt{\mathbb{E}[B_i]} \\
& \leq \mathbb{E}\left[(\xi_1(f-f^*)(X_1))^2\right] + 4\sqrt{\mathbb{E}\left[(\xi_1(f-f^*)(X_1))^4\right]} \sum_{i \geq 0} \sqrt{\beta(i)} \\
& \leq \mathbb{E}\left[(\xi_1(f-f^*)(X_1))^2\right] + 4\sqrt{\mathbb{E}\left[(\xi_1(f-f^*)(X_1))^4\right]} \sum_{i \geq 0} \exp(-ci^{\eta_1}/2) \\
& \leq 2^{\frac{2}{\eta_2}} + C4^{1+\frac{2}{\eta_2}}.
\end{aligned}$$

Combining (66), and (67), with probability at least  $\mathcal{P}_1 - \mathcal{P}_2$ , for every  $f \in \mathcal{F}$  that satisfies  $\|f-f^*\|_{L_2} \geq \max(\rho, \mathcal{A}(N))$ , we get

$$P_N L_f \geq -2\tau_0\|f-f^*\|_{L_2}^2 + \frac{\tau^2\|f-f^*\|_{L_2}^2 Q_{\mathcal{H}}(2\tau)}{4}.$$

Choosing  $\tau_0 < \tau^2 Q_{\mathcal{H}}(2\tau)/8$ , we have,

$$P_N L_f > 0.$$

But the empirical minimizer  $\hat{f}$  satisfies  $P_N L_{\hat{f}} \leq 0$ . This implies, together with choosing  $\mathcal{A}(N) = N^{-1/4+\iota}$ , that with probability at least  $\mathcal{P} = \mathcal{P}_1 - \mathcal{P}_2$ ,

$$\|\hat{f} - f^*\|_{L_2} \leq \max(\omega_\mu(\mathcal{F} - \mathcal{F}, \tau Q_{\mathcal{F}-\mathcal{F}}(2\tau)/16), \mathcal{A}(N)),$$

where

$$\begin{aligned}
\mathcal{P} & = 1 - 2\exp\left(-\frac{NQ_{\mathcal{H}}(2\tau)^3}{2(4-Q_{\mathcal{H}}(2\tau))^2} \left(\frac{c}{\mathcal{G}(N)}\right)^{\frac{1}{\eta_1}}\right) - \frac{NQ_{\mathcal{H}}(2\tau)c^{\frac{1}{\eta_1}}}{4\mathcal{G}(N)^{\frac{1}{\eta_1}}}\exp(-\mathcal{G}(N)) \\
& - N\exp\left(-\frac{(N^{\frac{1}{2}+2\iota}\tau_0)^\eta}{C_1}\right) - \exp\left(-\frac{N^{1+4\iota}\tau_0^2}{C_2(1+NV)}\right) - \exp\left(-\frac{N^{4\iota}\tau_0^2}{C_3}\exp\left(\frac{(1-\eta)^\eta(N^{\frac{1}{2}+2\iota}\tau_0)^{\frac{\eta(1-\eta)}{2}}}{C_42^\eta}\right)\right).
\end{aligned}$$



Choosing  $\mathcal{G}(N) = N^{(1-r)\eta_1}$  for some  $0 < r < 1$ , we get,

$$\begin{aligned} \mathcal{P} &= 1 - 2\exp\left(-\frac{N^r Q_{\mathcal{H}}(2\tau)^3 c^{\frac{1}{\eta_1}}}{2(4 - Q_{\mathcal{H}}(2\tau))^2}\right) - \frac{N^r Q_{\mathcal{H}}(2\tau) c^{\frac{1}{\eta_1}}}{4} \exp(-N^{(1-r)\eta_1}) \\ &\quad - N\exp\left(-\frac{(N^{\frac{1}{2}+2\iota}\tau_0)^\eta}{C_1}\right) - \exp\left(-\frac{N^{1+4\iota}\tau_0^2}{C_2(1+NV)}\right) \\ &\quad - \exp\left(-\frac{N^{4\iota}\tau_0^2}{C_3} \exp\left((1-\eta)^\eta \frac{(N^{\frac{1}{2}+2\iota}\tau_0)^{\frac{\eta(1-\eta)}{2}}}{C_4 2^\eta}\right)\right), \end{aligned}$$

and

$$\mu = \frac{N^r Q_{\mathcal{H}}(2\tau) c^{\frac{1}{\eta_1}}}{4}. \quad (68)$$

We now prove **part 2**. Since Lemma B.1 only depends on Condition (a) and (b) of Assumption 2.1, Lemma B.1 remains unchanged in this case. To deal with the multiplier process we need a concentration result similar to Lemma 2.1. So we use the concentration inequality we proved in Lemma 2.2. When  $\|f - f^*\|_{L_2} \geq \mathcal{A}(N)$ , using Lemma 2.2 we have

$$\begin{aligned} &\mathbb{P}\left(\left|\frac{1}{N} \sum_{i=1}^N \xi_i(f - f^*)(X_i) - \mathbb{E}[\xi(f - f^*)]\right| \geq \tau_0 \|f - f^*\|_{L_2}^2\right) \\ &\leq \frac{2^{\eta_2+3}}{(d_2 \log N \tau_0 \|f - f^*\|_{L_2}^2)^{\frac{1-\eta_2}{\eta_1}}} N(N\tau_0 \|f - f^*\|_{L_2}^2)^{-(1+d_1(\eta_2-1))} + 8N(N\tau_0 \|f - f^*\|_{L_2}^2)^{-(1+d_2c')} \\ &\quad + 2e^{-\frac{(N\tau_0 \|f - f^*\|_{L_2}^2)^{2-2d_1} (d_2 \log(N\tau_0 \|f - f^*\|_{L_2}^2))^{1/\eta_1}}{9N}} \\ &\leq \frac{2^{\eta_2+3}}{(d_2 \log(N\tau_0 \mathcal{A}(N)^2))^{\frac{1-\eta_2}{\eta_1}}} N(N\tau_0 \mathcal{A}(N)^2)^{-(1+d_1(\eta_2-1))} + 8N(N\tau_0 \mathcal{A}(N)^2)^{-(1+d_2c')} \\ &\quad + 2e^{-\frac{(N\tau_0 \mathcal{A}(N)^2)^{2-2d_1} (d_2 \log(N\tau_0 \mathcal{A}(N)^2))^{1/\eta_1}}{9N}} \equiv \mathcal{P}_2. \quad (69) \end{aligned}$$

We will choose  $d_1$  suitably to allow  $\mathcal{A}(N)$  to decrease with  $N$  as fast as possible while ensuring  $\lim_{N \rightarrow \infty} \mathcal{P}_2 \rightarrow 0$ . Combining (66), and (69), with probability at least  $\mathcal{P}_1 - \mathcal{P}_2$ , for every  $f \in \mathcal{F}$  that satisfies  $\|f - f^*\|_{L_2} \geq \max(\rho, \mathcal{A}(N))$ , we get

$$P_N L_f \geq -2\tau_0 \|f - f^*\|_{L_2}^2 + \frac{\tau^2 \|f - f^*\|_{L_2}^2 Q_{\mathcal{H}}(2\tau)}{4}.$$

Choosing  $\tau_0 < \tau^2 Q_{\mathcal{H}}(2\tau)/8$ , we have,

$$P_N L_f > 0.$$

But the empirical minimizer  $\hat{f}$  satisfies  $P_N L_{\hat{f}} \leq 0$ . This implies, together with choosing  $\mathcal{A}(N) = N^{-(1-1/\eta_2)/4+\iota}$ ,  $d_1 = 1/(1+\eta_2)$ ,  $d_2 = (\eta_2 - 1)/(\eta_2 + 1)$ , and  $\iota < (1 - 1/\eta_2)/4$ , that with probability at least  $\mathcal{P} = \mathcal{P}_1 - \mathcal{P}_2$ ,

$$\|\hat{f} - f^*\|_{L_2} \leq \max(\omega_\mu(\mathcal{F} - \mathcal{F}, \tau Q_{\mathcal{F}-\mathcal{F}}(2\tau)/16), \mathcal{A}(N)),$$

where

$$\begin{aligned} \mathcal{P} &= 1 - 2\exp\left(-\frac{NQ_{\mathcal{H}}(2\tau)^3}{2(4 - Q_{\mathcal{H}}(2\tau))^2} \left(\frac{c}{\mathcal{G}(N)}\right)^{\frac{1}{\eta_1}}\right) - \frac{NQ_{\mathcal{H}}(2\tau) c^{\frac{1}{\eta_1}}}{4\mathcal{G}(N)^{\frac{1}{\eta_1}}} \exp(-\mathcal{G}(N)) \\ &\quad - \frac{2^{\eta_2+3} \tau_0^{-\frac{2\eta_2}{1+\eta_2}}}{\left(\log\left(\tau_0 N^{\frac{1}{2} + \frac{1}{2\eta_2} + 2\iota}\right)/2\right)^{\frac{1-\eta_2}{\eta_1}}} N^{-\frac{4\iota\eta_2}{1+\eta_2}} - 8\tau_0^{-\frac{2\eta_2}{1+\eta_2}} N^{-\frac{4\iota\eta_2}{1+\eta_2}} - 2e^{-\frac{2\eta_2}{\tau_0^{\frac{1+\eta_2}{2}} \left(\log\left(\tau_0 N^{\frac{1}{2} + \frac{1}{2\eta_2} + 2\iota}\right)/2\right)^{1/\eta_1}} N^{\frac{4\iota\eta_2}{1+\eta_2}}}. \end{aligned}$$

Choosing  $\mathcal{G}(N) = N^{(1-r)\eta_1}$  for some  $0 < r < 1$ , we get,

$$\begin{aligned} \mathcal{P} = & 1 - 2 \exp\left(-\frac{N^r Q_{\mathcal{H}}(2\tau)^3 c^{\frac{1}{\eta_1}}}{2(4 - Q_{\mathcal{H}}(2\tau))^2}\right) - \frac{N^r Q_{\mathcal{H}}(2\tau) c^{\frac{1}{\eta_1}}}{4} \exp(-N^{(1-r)\eta_1}) \\ & - \frac{2\eta_2 + 3\tau_0^{-\frac{2\eta_2}{1+\eta_2}}}{\left(\log\left(\tau_0 N^{\frac{1}{2} + \frac{1}{2\eta_2} + 2\iota}\right)/2\right)^{\frac{1-\eta_2}{\eta_1}}} N^{-\frac{4\iota\eta_2}{1+\eta_2}} - 8\tau_0^{-\frac{2\eta_2}{1+\eta_2}} N^{-\frac{4\iota\eta_2}{1+\eta_2}} - 2e^{-\frac{\tau_0^{\frac{2\eta_2}{1+\eta_2}} \left(\log\left(\tau_0 N^{\frac{1}{2} + \frac{1}{2\eta_2} + 2\iota}\right)/2\right)^{1/\eta_1}}{9}} N^{\frac{4\iota\eta_2}{1+\eta_2}}, \end{aligned}$$

and

$$\mu = \frac{N^r Q_{\mathcal{H}}(2\tau) c^{\frac{1}{\eta_1}}}{4}. \quad (70)$$

■

*Proof.* [Proof of Corollary 3.1] Note that Assumption 3.1 implies Condition (b) of Assumption 2.1 as shown in Lemma 4.1 in [Men15]. Under Assumption 3.1 with  $p = 8$ , using Cauchy-Schwarz inequality we have,

$$\begin{aligned} V & \leq \mathbb{E} \left[ (\xi_1(f - f^*)(X_1))^2 \right] + 4\sqrt{\mathbb{E} \left[ (\xi_1(f - f^*)(X_1))^4 \right]} \sum_{i \geq 0} \exp(-ci^{\eta_1}/2) \\ & \leq \sqrt{\mathbb{E} [\xi_1^4]} \sqrt{\mathbb{E} \left[ ((f - f^*)(X_1))^4 \right]} + 4C \sqrt{\sqrt{\mathbb{E} [\xi_1^8]} \sqrt{\mathbb{E} \left[ ((f - f^*)(X_1))^8 \right]}} \\ & \leq M_1^2 \|f - f^*\|_{L_2}^2 \left( \sqrt{\mathbb{E} [\xi_1^4]} + 4C (\mathbb{E} [\xi_1^8])^{\frac{1}{4}} \right) \\ & \leq M_2^2 \|f - f^*\|_{L_2}^2, \end{aligned}$$

for some constant  $M_2$ . Then, from (67) we have,

$$\begin{aligned} & \mathbb{P} \left( \left| \frac{1}{N} \sum_{i=1}^N \xi_i(f - f^*)(X_i) - \mathbb{E} [\xi(f - f^*)] \right| \geq \tau_0 \|f - f^*\|_{L_2}^2 \right) \\ & \leq N \exp\left(-\frac{(N\tau_0 \|f - f^*\|_{L_2}^2)^\eta}{C_1}\right) + \exp\left(-\frac{N^2 \tau_0^2 \|f - f^*\|_{L_2}^4}{C_2(1 + NV)}\right) \\ & \quad + \exp\left(-\frac{N\tau_0^2 \|f - f^*\|_{L_2}^4}{C_3} \exp\left(\frac{(N\tau_0 \|f - f^*\|_{L_2}^2)^\eta (1-\eta)}{C_4 (\log(N\tau_0 \|f - f^*\|_{L_2}^2))^\eta}\right)\right) \\ & \leq N \exp\left(-\frac{(N\tau_0 \|f - f^*\|_{L_2}^2)^\eta}{C_1}\right) + \exp\left(-\frac{N^2 \tau_0^2 \|f - f^*\|_{L_2}^4}{C_2(1 + NM_2^2 \|f - f^*\|_{L_2}^2)}\right) \\ & \quad + \exp\left(-\frac{N\tau_0^2 \|f - f^*\|_{L_2}^4}{C_3} \exp\left(\frac{(N\tau_0 \|f - f^*\|_{L_2}^2)^\eta (1-\eta)}{C_4 (\log(N\tau_0 \|f - f^*\|_{L_2}^2))^\eta}\right)\right). \end{aligned}$$

If  $N \|f - f^*\|_{L_2}^2 \geq N \mathcal{A}(N)^2 \geq \max(1/M_2^2, 1/\tau_0)$ , then

$$\begin{aligned} & \mathbb{P} \left( \left| \frac{1}{N} \sum_{i=1}^N \xi_i(f - f^*)(X_i) - \mathbb{E} [\xi(f - f^*)] \right| \geq \tau_0 \|f - f^*\|_{L_2}^2 \right) \\ & \leq N \exp\left(-\frac{(N\tau_0 \|f - f^*\|_{L_2}^2)^\eta}{C_1}\right) + \exp\left(-\frac{N\tau_0^2 \|f - f^*\|_{L_2}^2}{2C_2 M_2^2}\right) \\ & \quad + \exp\left(-\frac{N\tau_0^2 \|f - f^*\|_{L_2}^4}{C_3} \exp\left(\frac{(1-\eta)^\eta (N\tau_0 \mathcal{A}(N)^2)^{\frac{\eta(1-\eta)}{2}}}{C_4 2^\eta}\right)\right), \end{aligned}$$

and the second term dominates the third term in the above expression. Now if choose  $\mathcal{A}(N) = N^{-1/2+\iota}$ , then with probability at least

$$\mathcal{P} = 1 - \exp\left(-\frac{N^{2\iota} \tau_0^2}{2C_2 M_2^2}\right) - \exp\left(-\frac{N^{4\iota-1} \tau_0^2}{C_3} \exp\left(\frac{(1-\eta)^\eta (N^{2\iota} \tau_0)^{\frac{\eta(1-\eta)}{2}}}{C_4 2^\eta}\right)\right),$$

we get

$$\|\hat{f} - f^*\|_{L_2} \leq \max \left( N^{-1/2+\iota}, \omega_\mu(\mathcal{F} - \mathcal{F}, \tau Q_{\mathcal{F}-\mathcal{F}}(2\tau)/16) \right).$$

■

## B.2 Proofs for convex loss

Recall the decomposition (1)

$$P_N L_f \geq \frac{1}{16N} \sum_{i=1}^N \ell''(\tilde{\xi}_i)(f - f^*)^2(X_i) + \frac{1}{N} \sum_{i=1}^N \ell'(\xi_i)(f - f^*)(X_i).$$

Since  $\mathcal{F}$  is convex, we also have

$$\mathbb{E}[\ell'(\xi)(f - f^*)(X)] \geq 0.$$

Then,

$$P_N L_f \geq \frac{1}{16N} \sum_{i=1}^N \ell''(\tilde{\xi}_i)(f - f^*)^2(X_i) + \frac{1}{N} \sum_{i=1}^N (\ell'(\xi_i)(f - f^*)(X_i) - \mathbb{E}[\ell'(\xi_i)(f - f^*)(X_i)]). \quad (71)$$

Now our goal is to establish a lower bound (Proposition B.1) on the first term of the RHS of (71), and a two-sided bound ((93) and (94)) on the second term when  $\|f - f^*\|_{L_2}$  is large. Combining these bounds we will show that if  $\|f - f^*\|_{L_2}$  is large then  $P_N L_f > 0$  which implies  $f$  cannot be a minimizer of empirical risk because for the minimizer  $\hat{f}$  we have  $P_N L_{\hat{f}} \leq 0$ . Let  $\rho(t_1, t_2) := \inf\{\ell''(x) : x \in [t_1, t_2], 0 \leq t_1 < t_2\}$ . First we prove the following extension of bounded difference inequality to the  $\beta$ -mixing sequence which we will use frequently in our proofs.

**Lemma B.3** (Bounded difference inequality for strictly stationary  $\beta$ -mixing sequence). *Let  $\{U_i\}_{i=1}^N$  be a sample from a strictly stationary  $\beta$ -mixing sequence,  $|U_i| \leq M$ , and  $\mathbb{E}[U_i] = U^*$ . Let  $N > a, b, \mu > 0$  be such that  $(a + b)\mu = N$ . Then with probability at least  $1 - \exp\left(-\frac{(t-2b\mu)^2}{2\mu a^2 M^2}\right) - 2M(\mu - 1)\beta(b)$ , we have  $\forall t > 2b\mu$ ,*

$$\sum_{i=1}^N U_i \leq NU^* + t.$$

*Proof.* Consider the partition as in (6). Then, using Corollary 2.7 of [Yu94], we get  $\forall t > 2b\mu$ ,

$$\begin{aligned} & \mathbb{P}\left(\sum_{i=1}^N (U_i - U^*) \geq t\right) \\ & \leq \mathbb{P}\left(\sum_{i=1}^{\mu} \sum_{j=1}^a (U_i - U^*) \geq t - 2b\mu\right) \\ & \leq \mathbb{P}\left(\sum_{i=1}^{\mu} \sum_{j=1}^a (\tilde{U}_{(a+b)(i-1)+j} - U^*) \geq t - 2b\mu\right) + 2M(\mu - 1)\beta(b). \end{aligned}$$

where  $\sum_{j=1}^a (\tilde{U}_{(a+b)(i-1)+j} - U^*)$  is an iid sequence for  $i = 1, 2, \dots, \mu$ . Using bounded difference inequality,

$$\mathbb{P}\left(\sum_{i=1}^{\mu} \sum_{j=1}^a (\tilde{U}_{(a+b)(i-1)+j} - U^*) \geq t - 2b\mu\right) \leq \exp\left(-\frac{(t-2b\mu)^2}{2\mu a^2 M^2}\right) + 2M(\mu - 1)\beta(b).$$

So with probability at least  $1 - \exp\left(-\frac{(t-2b\mu)^2}{2\mu a^2 M^2}\right) - 2M(\mu - 1)\beta(b)$ ,

$$\sum_{i=1}^N U_i \leq NU^* + t.$$

Lemma B.4-B.6 are needed to prove Lemma B.7 which is the main result needed to prove Proposition B.1. ■

**Lemma B.4.** *Let  $X_i, i = 1, 2, \dots, N$  be a sample from a sequence for which condition (a) of Assumption 2.1 is true. For every  $0 < Q_{\mathcal{H}}(2\tau) < 1$ , we have that with probability at least  $1 - c_1 Q_{\mathcal{H}}(2\tau)^{1 - \frac{1}{\eta_1}} N^{\eta_1/(1+\eta_1)} e^{-c_2 Q_{\mathcal{H}}(2\tau)^{1 + \frac{1}{\eta_1}} N^{\eta_1/(1+\eta_1)}}$ , for some constants  $c_1, c_2 > 0$ , there is a subset  $S \subset \{1, 2, \dots, N\}$  such that  $|S| \geq N(1 - Q_{\mathcal{H}}(2\tau))$ , and  $\forall i \in S$ ,*

$$|X_i| \leq \frac{2\|X_i\|_{L_2}}{\sqrt{Q_{\mathcal{H}}(2\tau)}}. \quad (72)$$

*Proof.* Let  $\zeta_i = \mathbb{1}\left(|X_i| \geq \frac{2\|X_i\|_{L_2}}{\sqrt{Q_{\mathcal{H}}(2\tau)}}\right)$ . Then, by Markov's inequality,

$$\mathbb{E}[\zeta_i] = \mathbb{P}\left(|X_i| \geq \frac{2\|X_i\|_{L_2}}{\sqrt{Q_{\mathcal{H}}(2\tau)}}\right) \leq Q_{\mathcal{H}}(2\tau)/4.$$

Then using Lemma B.3, we have with probability at least  $1 - \exp\left(-\frac{(t-2b\mu)^2}{2\mu a^2}\right) - 2(\mu - 1)\beta(b)$ ,

$$\sum_{i=1}^N \zeta_i \leq \frac{NQ_{\mathcal{H}}(2\tau)}{4} + t.$$

Now, setting

$$t = \frac{3NQ_{\mathcal{H}}(2\tau)}{4} \quad a = \frac{(4 - Q_{\mathcal{H}}(2\tau))N^{\frac{1}{1+\eta_1}}}{c^{\frac{1}{\eta_1}} Q_{\mathcal{H}}(2\tau)^{1 - \frac{1}{\eta_1}}} \quad b = \frac{Q_{\mathcal{H}}(2\tau)^{\frac{1}{\eta_1}} N^{\frac{1}{1+\eta_1}}}{c^{\frac{1}{\eta_1}}} \quad \mu = \frac{N^{\frac{\eta_1}{1+\eta_1}} c^{\frac{1}{\eta_1}} Q_{\mathcal{H}}(2\tau)^{\frac{\eta_1-1}{\eta_1}}}{4}, \quad (73)$$

we have  $\sum_{i=1}^N \zeta_i \leq NQ_{\mathcal{H}}(2\tau)$ , with probability at least

$$1 - c_1 Q_{\mathcal{H}}(2\tau)^{1 - \frac{1}{\eta_1}} N^{\eta_1/(1+\eta_1)} e^{-c_2 Q_{\mathcal{H}}(2\tau) N^{\eta_1/(1+\eta_1)}}. \quad \blacksquare$$

**Lemma B.5.** *Let  $X_i, i = 1, 2, \dots, N$  be a sample from a sequence for which condition (a) and (b) of Assumption 2.1 is true. Then with probability at least with*

$$1 - c_1 Q_{\mathcal{H}}(2\tau)^{1 - \frac{1}{\eta_1}} N^{\eta_1/(1+\eta_1)} e^{-c_2 Q_{\mathcal{H}}(2\tau) N^{\eta_1/(1+\eta_1)}},$$

*there is a subset  $S \subset \{1, 2, \dots, N\}$  such that  $|S| \geq 3NQ_{\mathcal{H}}(2\tau)/4$ , and  $\forall i \in S, |X_i| \geq 2\|X_i\|_{L_2}$ .*

*Proof.* Let  $\zeta_i = \mathbb{1}(|X_i| \geq 2\|X_i\|_{L_2})$ . Using condition (b) of Assumption 2.1, we have  $\mathbb{E}[\zeta_i] > Q_{\mathcal{H}}(2\tau)$ . Then using Lemma B.3, with probability at least

$$1 - c_1 Q_{\mathcal{H}}(2\tau)^{1 - \frac{1}{\eta_1}} N^{\eta_1/(1+\eta_1)} e^{-c_2 Q_{\mathcal{H}}(2\tau) N^{\eta_1/(1+\eta_1)}},$$

we have

$$3NQ_{\mathcal{H}}(2\tau)/4 \leq \sum_{i=1}^N \zeta_i \leq 5N\mathbb{E}[\zeta_i]/4. \quad \blacksquare$$

**Lemma B.6.** *Let  $X_i, i = 1, 2, \dots, N$  be a sample from a sequence for which conditions (a) and (b) of Assumption 2.1 is true. Then with probability at least with*

$$1 - c_1 Q_{\mathcal{H}}(2\tau)^{1 - \frac{1}{\eta_1}} N^{\eta_1/(1+\eta_1)} e^{-c_2 Q_{\mathcal{H}}(2\tau) N^{\eta_1/(1+\eta_1)}},$$

*there is a subset  $S \subset \{1, 2, \dots, N\}$  such that  $|S| \geq NQ_{\mathcal{H}}(2\tau)/2$ , and  $\forall i \in S$ ,*

$$2\|X_i\|_{L_2} \leq |X_i| \leq \frac{2\|X_i\|_{L_2}}{\sqrt{Q_{\mathcal{H}}(2\tau)}}.$$

*Proof.* The proof is immediate from Lemma B.4, and Lemma B.5.  $\blacksquare$

**Lemma B.7.** *Let  $\mathcal{H}$  be a class of function which is star-shaped around 0 and satisfies condition (b) of Assumption 2.1. If  $\zeta_1 \sim 2\tau Q_{\mathcal{H}}(2\tau)^{3/2}$ ,  $\zeta_2 \sim 2\tau Q_{\mathcal{H}}(2\tau)$ , and  $r = \|h\|_{L_2} > \omega_Q(\zeta_1, \zeta_2)$ , there is a set  $V_r \subset \mathcal{H} \cap rS(L_2)$  such that there is an event  $\mathcal{A}$  with probability at least  $1 - c_6 Q_{\mathcal{H}}(2\tau)^{1 - \frac{1}{\eta_1}} N^{\eta_1/(1+\eta_1)} e^{-c_7 Q_{\mathcal{H}}(2\tau) N^{\eta_1/(1+\eta_1)}}$  we have:*

1.

$$|V_r| \leq \exp(c'_2 Q_{\mathcal{H}}(2\tau) N^{\eta_1/(1+\eta_1)}/2), \quad (74)$$

where  $c'_2 \leq 1/1000$

2. *For every  $v \in V_r$  there is a subset  $S_v \subset \{1, 2, \dots, N\}$  such that  $|S_v| \geq Q_{\mathcal{H}}(2\tau)N/2$ , and for every  $i \in S_v$ ,*

$$2\tau r \leq |v(X_i)| \leq \frac{c_3 r}{\sqrt{Q_{\mathcal{H}}(2\tau)}}. \quad (75)$$

3. *For every  $h \in \mathcal{H} \cap rS(L_2)$  there is some  $v \in V_r$ , and a subset  $K_h \subset S_v$ , containing at least  $3/4$  of the coordinates of  $S_v$ , and for every  $k \in K_h$ ,*

$$\tau \|h\|_{L_2} \leq |h(X_k)| \leq c_9 \left( 2\tau + \frac{1}{\sqrt{Q_{\mathcal{H}}(2\tau)}} \right) \|h\|_{L_2}, \quad (76)$$

and  $h(X_k)$  and  $v(X_k)$  have the same sign.

*Proof.* Let  $r = \|h\|_{L_2} > \omega_Q(\zeta_1, \zeta_2)$ . Let  $V_r \subset \mathcal{H} \cap rS(L_2)$  be a maximal  $\rho$ -separated set such that

$$|V_r| \leq \exp(c'_2 Q_{\mathcal{H}}(2\tau) N^{\eta_1/(1+\eta_1)}/2)$$

where  $c'_2 = \min(c_2, 1/500)$ . Applying Lemma B.6 on all the elements of  $V_r$ , using union bound we obtain that with probability at least

$$1 - c_1 Q_{\mathcal{H}}(2\tau)^{1 - \frac{1}{\eta_1}} N^{\eta_1/(1+\eta_1)} e^{-c_2 Q_{\mathcal{H}}(2\tau) N^{\eta_1/(1+\eta_1)}/2},$$

for every  $v \in V_r$  there is a subset  $S_v$  such that  $|S_v| \geq N Q_{\mathcal{H}}(2\tau)/2$  and for all  $i \in S_v$ , we have

$$2\tau \|v(X_i)\|_{L_2} \leq |v(X_i)| \leq \frac{c_3 \|v(X_i)\|_{L_2}}{\sqrt{Q_{\mathcal{H}}(2\tau)}}. \quad (77)$$

Since we have assumed  $r > \omega_1(\zeta_1)$ , from Sudakov's inequality we have,

$$\rho \leq c_4 \frac{\sqrt{2} \mathbb{E} [\|G\|_{\mathcal{H} \cap rS(L_2)}]}{\sqrt{c_2 Q_{\mathcal{H}}(2\tau) N^{\eta_1/(1+\eta_1)}}} \leq \frac{c_5 \zeta_1 r}{\sqrt{Q_{\mathcal{H}}(2\tau)}}, \quad (78)$$

where  $c_5 = \sqrt{2} c_4 / \sqrt{c_2}$ . For all  $h \in \mathcal{H} \cap rS(L_2)$ , let  $h_v \in V_r$  so that  $\|h - h_v\|_{L_2} \leq \rho$ . Now let  $\delta_h = \mathbb{1}_{(|h - h_v| > \tau r)}$  and put

$$\Delta_r = \{\delta_h : h \in \mathcal{H} \cap rS(L_2)\}. \quad (79)$$

Define a function  $\psi_1(t) = \max(\min(t/(\tau r), 1), 0)$ . Observe that  $\delta_h(X) \leq \psi_1(|h - h_v|(X))$ . Now we want to show that the number of points where  $|h - h_v| > \tau r$  is small.

$$\begin{aligned} & \mathbb{E} \left[ \sup_{\delta_h \in \Delta_r} \frac{1}{N} \sum_{i=1}^N \delta_h(X_i) \right] \\ & \leq \mathbb{E} \left[ \sup_{h \in \mathcal{H} \cap rS(L_2)} \frac{1}{N} \sum_{i=1}^N \psi_1(|h - h_v|(X_i)) \right] \\ & \leq \mathbb{E} \left[ \sup_{h \in \mathcal{H} \cap rS(L_2)} \frac{1}{N} \sum_{i=1}^N (\psi_1(|h - h_v|(X_i)) - \mathbb{E}[\psi_1(|h - h_v|(X))]) \right] + \mathbb{E} \left[ \sup_{h \in \mathcal{H} \cap rS(L_2)} \mathbb{E}[\psi_1(|h - h_v|(X))] \right], \end{aligned}$$

where  $X \sim \pi$ . Consider the partition introduced in (6). Then,

$$\begin{aligned}
& \mathbb{E} \left[ \sup_{\delta_h \in \Delta_r} \frac{1}{N} \sum_{i=1}^N \delta_h(X_i) \right] \\
& \leq \mathbb{E} \left[ \sup_{h \in \mathcal{H} \cap rS(L_2)} \frac{1}{N} \sum_{i=1}^{\mu} \sum_{j=1}^a (\psi_1(|h - h_v|(X_{(a+b)(i-1)+j})) - \mathbb{E}[\psi_1(|h - h_v|(X))]) \right] \\
& \quad + \frac{2b\mu}{N} + \frac{1}{\tau r} \mathbb{E} \left[ \sup_{h \in \mathcal{H} \cap rS(L_2)} \mathbb{E}[|h - h_v|(X)] \right] \\
& \leq \frac{\mu}{N} \sum_{j=1}^a \mathbb{E} \left[ \sup_{h \in \mathcal{H} \cap rS(L_2)} \frac{1}{\mu} \sum_{i=1}^{\mu} (\psi_1(|h - h_v|(X_{(a+b)(i-1)+j})) - \mathbb{E}[\psi_1(|h - h_v|(X))]) \right] \\
& \quad + \frac{2b\mu}{N} + \frac{\rho}{\tau r} \\
& \leq \frac{\mu}{N} \sum_{j=1}^a \mathbb{E} \left[ \sup_{h \in \mathcal{H} \cap rS(L_2)} \frac{1}{\mu} \sum_{i=1}^{\mu} (\psi_1(|h - h_v|(\tilde{X}_{(a+b)(i-1)+j})) - \mathbb{E}[\psi_1(|h - h_v|(X))]) \right] \\
& \quad + 2(\mu - 1)\beta(a + b) + \frac{2b\mu}{N} + \frac{\rho}{\tau r}.
\end{aligned}$$

Now using symmetrization, we get

$$\begin{aligned}
\mathbb{E} \left[ \sup_{\delta_h \in \Delta_r} \frac{1}{N} \sum_{i=1}^N \delta_h(X_i) \right] & \leq \frac{\mu}{N} \sum_{j=1}^a \mathbb{E} \left[ \sup_{h \in \mathcal{H} \cap rS(L_2)} \frac{1}{\mu} \sum_{i=1}^{\mu} Q_{\mathcal{H}}(2\tau)_i \psi_1(|h - h_v|(\tilde{X}_{(a+b)(i-1)+j})) \right] \\
& \quad + 2(\mu - 1)\beta(a + b) + \frac{2b\mu}{N} + \frac{\rho}{\tau r}.
\end{aligned}$$

Since  $\psi_1(|\cdot|)$  is a  $1/(\tau r)$ -Lipschitz continuous mapping, using properties of Rademacher complexity we have

$$\begin{aligned}
& \mathbb{E} \left[ \sup_{h \in \mathcal{H} \cap rS(L_2)} \frac{1}{\mu} \sum_{i=1}^{\mu} Q_{\mathcal{H}}(2\tau)_i \psi_1(|h - h_v|(\tilde{X}_{(a+b)(i-1)+j})) \right] \\
& \leq \frac{1}{\tau r} \mathbb{E} \left[ \sup_{h \in \mathcal{H} \cap rS(L_2)} \frac{1}{\mu} \sum_{i=1}^{\mu} Q_{\mathcal{H}}(2\tau)_i (h - h_v)(\tilde{X}_{(a+b)(i-1)+j}) \right].
\end{aligned}$$

Since we assumed  $r > \omega_2(\zeta_2)$ , and using (78) we have,

$$\mathbb{E} \left[ \sup_{\delta_h \in \Delta_r} \frac{1}{N} \sum_{i=1}^N \delta_h(X_i) \right] \leq \frac{a\zeta_2\mu}{N\tau} + 2(\mu - 1)\beta(a + b) + \frac{2b\mu}{N} + \frac{c_5\zeta_1}{\tau\sqrt{Q_{\mathcal{H}}(2\tau)}}.$$

Choosing

$$\zeta_1 \sim 2\tau Q_{\mathcal{H}}(2\tau)^{\frac{3}{2}} \quad \zeta_2 \sim 2\tau Q_{\mathcal{H}}(2\tau) \quad a \sim \frac{(4 - Q_{\mathcal{H}}(2\tau))N^{1/(1+\eta_1)}}{c^{\frac{1}{\eta_1}}} \quad (80)$$

$$b \sim \frac{Q_{\mathcal{H}}(2\tau)N^{1/(1+\eta_1)}}{c^{\frac{1}{\eta_1}}} \quad \text{and} \quad \mu \sim \frac{N^{\eta_1/(1+\eta_1)}c^{\frac{1}{\eta_1}}}{4}, \quad (81)$$

we have,

$$\mathbb{E} \left[ \sup_{\delta_h \in \Delta_r} \frac{1}{N} \sum_{i=1}^N \delta_h(X_i) \right] \leq \frac{Q_{\mathcal{H}}(2\tau)}{32}.$$

Now we use Lemma B.3, with the following choice

$$t = \frac{NQ_{\mathcal{H}}(2\tau)}{32} \quad a = \frac{(4 - \frac{Q_{\mathcal{H}}(2\tau)}{16})N^{1/(1+\eta_1)}}{c^{\frac{1}{\eta_1}}Q_{\mathcal{H}}(2\tau)^{1-\frac{1}{\eta_1}}} \quad b = \frac{Q_{\mathcal{H}}(2\tau)^{\frac{1}{\eta_1}}N^{1/(1+\eta_1)}}{32c^{\frac{1}{\eta_1}}} \quad \mu = \frac{N^{\eta_1/(1+\eta_1)}c^{\frac{1}{\eta_1}}Q_{\mathcal{H}}(2\tau)^{\frac{\eta_1-1}{\eta_1}}}{4}.$$

With probability at least  $1 - c_6 Q_{\mathcal{H}}(2\tau)^{1 - \frac{1}{\eta_1}} N^{\eta_1/(1+\eta_1)} e^{-c_7 Q_{\mathcal{H}}(2\tau) N^{\eta_1/(1+\eta_1)}}$  we have,

$$\frac{1}{N} \sum_{i=1}^N \sup_{\delta_h \in \Delta_r} \delta_h(X_i) \leq \mathbb{E} \left[ \frac{1}{N} \sum_{i=1}^N \sup_{\delta_h \in \Delta_r} \delta_h(X_i) \right] + \frac{t}{N} \leq \frac{Q_{\mathcal{H}}(2\tau)}{16}.$$

Then  $\forall h \in \mathcal{H} \cap rS(L_2)$ ,

$$|\{i : |h - h_v|(X_i) \leq \tau r\}| \geq \left(1 - \frac{Q_{\mathcal{H}}(2\tau)}{16}\right) N. \quad (82)$$

Recall that  $h_v \in V_r$ , and  $|S_{h_v}| \geq NQ_{\mathcal{H}}(2\tau)/2$ . Let

$$K_h = \{k : |h - h_v|(X_k) \leq \tau r\} \cap S_{h_v}. \quad (83)$$

Then  $|K_h| \geq 3NQ_{\mathcal{H}}(2\tau)/8 \geq NQ_{\mathcal{H}}(2\tau)/4$ . Also,  $\forall k \in K_h$ ,

$$|h(X_k)| \geq |h_v(X_k)| - |(h - h_v)(X_k)| \geq 2\tau r - \tau r = \tau r. \quad (84)$$

This also implies that  $h(X_k)$  and  $h_v(X_k)$  have same signs. Similarly, using (77) we get

$$|h(X_k)| \leq |h_v(X_k)| + |(h - h_v)(X_k)| \leq c_9(2\tau + \frac{1}{\sqrt{Q_{\mathcal{H}}(2\tau)}}) \|h\|_{L_2}. \quad (85)$$

Combining (84) and (85) we have (76). This also implies that  $h(X_k)$  and  $v(X_k)$  have the same sign.  $\blacksquare$

**Lemma B.8** ([Men18, Lemma 4.8]). *Let  $1 \leq k \leq m/40$  and set  $\mathcal{D} \subset \{-1, 0, 1\}^m$  of cardinality at most  $\exp(k)$ . For every  $d = (d(i))_{i=1}^m \in \mathcal{D}$  put  $S_d = \{i : d(i) \neq 0\}$  and assume that  $|S_d| \geq 40k$ . If  $\{\epsilon_i\}_{i=1}^m$  are independent, symmetric  $\{-1, 1\}$ -valued random variables, then with probability at least  $1 - 2\exp(-k)$ ,*

$$\inf_{d \in \mathcal{D}} |\{i \in S_d : \text{sgn}(d(i)) = \epsilon_i\}| \geq k/3.$$

**Lemma B.9.** *Conditioned on the event  $\mathcal{A}$  as mentioned in Lemma B.7, with probability at least  $1 - 2\exp(-c_2 Q_{\mathcal{H}}(2\tau)N)$  we have: for every  $h \in \mathcal{H}_{f^*} := \mathcal{F} - f^*$  with  $\|h\|_{L_2} \geq r$ , there is a subset  $S_{1,h} \subset \{1, 2, \dots, N\}$  such that  $|S_{1,h}| \geq Q_{\mathcal{H}}(2\tau)N/24$ . and for every  $i \in S_{1,h}$ ,*

$$\tau \|h\|_{L_2} \leq |h(X_i)| \leq c_9 \left(2\tau + \frac{1}{\sqrt{Q_{\mathcal{H}}(2\tau)}}\right) \|h\|_{L_2}, \quad \text{sgn}(h(X_i)) = \epsilon_i, \quad (86)$$

where  $\{\epsilon_i\}_{i=1}^N$  are independent, symmetric  $\{-1, 1\}$ -valued random variables.

*Proof.* For a  $h \in \mathcal{H}$ , let  $\|h\|_{L_2} = r$  and let  $h_v$  be as in Lemma B.7. Recall from (76), that there is a subset  $K_h \subset S_{h_v}$  containing at least  $3/4$  of the coordinates of  $S_{h_v}$  for which,

$$\tau r \leq |h(X_j)| \leq c_9 \left(2\tau + \frac{1}{\sqrt{Q_{\mathcal{H}}(2\tau)}}\right) r,$$

and  $h(X_j)$  and  $h_v(X_j)$  have the same sign. Define

$$d_{h_v} = \{\text{sgn}(h_v(X_i)) \mathbb{1}_{S_{h_v}}(X_i)\}_{i=1}^N, \quad \mathcal{D} = \{d_{h_v} : h_v \in V_r\}.$$

Using Lemma B.8, on the set  $\mathcal{D} = \{d_{h_v} : d_{h_v} \in V_r\}$  for  $k = NQ_{\mathcal{H}}(2\tau)/1000$ , and observing that every  $d_{h_v} \in \mathcal{D}$ ,  $|\{i : d_{h_v}(i) \neq 0\}| \geq NQ_{\mathcal{H}}(2\tau)/2 \geq 40k$  (recall that  $|S_{h_v}| \geq NQ_{\mathcal{H}}(2\tau)/2$ ), we get with probability at least  $1 - 2\exp(-c_2 Q_{\mathcal{H}}(2\tau)N)$ , for every  $h_v \in V_r$ ,  $d_{h_v}(i) = \epsilon_i$  on at least  $1/3$  of the coordinates of  $S_{h_v}$ . Then it follows that on at least  $1/12$  of the coordinates of  $S_{h_v}$ ,  $h(X_j) = \epsilon_j$ . Since  $\mathcal{H}_{f^*}$  is assumed to be star-shaped the same result holds when  $\|h\|_{L_2} \geq r$ .  $\blacksquare$

**Proposition B.1.** *With probability at least  $1 - c_9 Q_{\mathcal{H}}(2\tau)^{1 - \frac{1}{\eta_1}} N^{\eta_1/(1+\eta_1)} e^{-c_{10} Q_{\mathcal{H}}(2\tau) N^{\eta_1/(1+\eta_1)}}$ , for every  $f \in \mathcal{F}$  which satisfies  $\|f - f^*\|_{L_2} \geq 2\omega_Q$  we have*

$$\frac{1}{N} \sum_{i=1}^N \ell''(\tilde{\xi}_i)(f - f^*)^2(X_i) \geq c_{16} Q_{\mathcal{H}}(2\tau) \rho(0, t_0) \tau^2 \|f - f^*\|_{L_2}^2. \quad (87)$$

where  $t_0 = c_{11}(2\tau + 1/\sqrt{Q_{\mathcal{H}}(2\tau)}) (\|\xi\|_{L_2} + \|f - f^*\|_{L_2})$ .

*Proof.* [Proof of Proposition B.1] Recall the decomposition of  $P_N L_f$  (1). For every  $(X, Y)$  the midpoint  $\tilde{\xi}$  belongs to the interval with end points  $-\xi$  and  $(f - f^*)(X) - \xi$  where  $f \in \mathcal{F}$ . So,

$$|\tilde{\xi}_i| \leq |\xi_i| + |(f - f^*)(X_i)|.$$

Let  $\|f - f^*\|_{L_2} > 2\omega_Q$ . Now from Lemma B.9, with probability at least

$$1 - c_9 Q_{\mathcal{H}}(2\tau)^{1 - \frac{1}{\eta_1}} N^{\eta_1/(1+\eta_1)} e^{-c_{10} Q_{\mathcal{H}}(2\tau) N^{\eta_1/(1+\eta_1)}},$$

we have a subset  $\mathcal{S}_{1,h} \subset \{1, 2, \dots, N\}$  such that  $|\mathcal{S}_{1,h}| \geq Q_{\mathcal{H}}(2\tau)N/24$ , and for every  $i \in \mathcal{S}_{1,h}$ ,

$$|(f - f^*)(X_i)| \leq c_9(2\tau + 1/\sqrt{Q_{\mathcal{H}}(2\tau)})\|f - f^*\|_{L_2}.$$

Using Markov's inequality,

$$\mathbb{P}(|\xi_i| > 10\|\xi\|_{L_2}/\sqrt{Q_{\mathcal{H}}(2\tau)}) \leq \frac{Q_{\mathcal{H}}(2\tau)}{100}.$$

Now taking  $U_i = \mathbb{1}\left(|\xi_i| \leq \frac{c_9\|\xi\|_{L_2}}{\sqrt{Q_{\mathcal{H}}(2\tau)}}\right)$ , and using Lemma B.3, and choosing parameters as in (73)

we get, with probability at least  $1 - c_1 Q_{\mathcal{H}}(2\tau)^{1 - \frac{1}{\eta_1}} N^{\eta_1/(1+\eta_1)} e^{-c_2 Q_{\mathcal{H}}(2\tau) N^{\eta_1/(1+\eta_1)}}$ ,

$$\left| \left\{ i : |\xi_i| \leq \frac{c_9\|\xi\|_{L_2}}{\sqrt{Q_{\mathcal{H}}(2\tau)}} \right\} \right| \geq N(1 - Q_{\mathcal{H}}(2\tau)/50).$$

This implies that with probability at least  $1 - c_{16} Q_{\mathcal{H}}(2\tau)^{1 - \frac{1}{\eta_1}} N^{\eta_1/(1+\eta_1)} e^{-c_{17} Q_{\mathcal{H}}(2\tau) N^{\eta_1/(1+\eta_1)}}$  we have,

$$|\tilde{\xi}_i| \leq c_{11}(2\tau + 1/\sqrt{Q_{\mathcal{H}}(2\tau)}) (\|\xi\|_{L_2} + \|f - f^*\|_{L_2}).$$

Set  $t_0 = c_{11}(2\tau + 1/\sqrt{Q_{\mathcal{H}}(2\tau)}) (\|\xi\|_{L_2} + \|f - f^*\|_{L_2})$ . Using Lemma B.9, with probability at least  $1 - c_9 Q_{\mathcal{H}}(2\tau)^{1 - \frac{1}{\eta_1}} N^{\eta_1/(1+\eta_1)} e^{-c_{10} Q_{\mathcal{H}}(2\tau) N^{\eta_1/(1+\eta_1)}}$ ,

$$\frac{1}{N} \sum_{i=1}^N \ell''(\tilde{\xi}_i)(f - f^*)^2(X_i) \geq c_{16} Q_{\mathcal{H}}(2\tau) \rho(0, t_0) \tau^2 \|f - f^*\|_{L_2}^2. \quad (88)$$

■

Using Proposition B.1, and proving the two-sided bounds for the second term on the RHS of (71) in (93) and (94), we have Proposition B.2.

**Proposition B.2.** Consider ERM with loss functions that satisfy Assumption 3.2. For  $\tau_0 < c_2 Q_{\mathcal{F}-\mathcal{F}}(2\tau) \rho(0, t_0) \tau^2$ ,  $t_0 = \mathcal{O}((2\tau + 1/\sqrt{Q_{\mathcal{H}}(2\tau)}) (\|\xi\|_{L_2} + \|f - f^*\|_{L_2}))$ , setting  $\mu = N^{\eta_1/(1+\eta_1)}$ , for some constants  $c, c' > 0$ , we have, for any  $N \geq 4$ , the following:

1. Under conditions (a), (b), (c)-(i), and (d) of Assumption 2.1, for  $0 < \iota < \frac{1}{4}$ ,

$$\|\hat{f} - f^*\|_{L_2} \leq \max \left\{ N^{-\frac{1}{4} + \iota}, 2\omega_Q(\mathcal{F} - \mathcal{F}, N, Q_{\mathcal{H}}(2\tau)^{3/2}, Q_{\mathcal{H}}(2\tau)) \right\}, \quad (89)$$

with probability at least (for  $V$  is defined in (8) and some positive  $c_9, c_{10}, \tilde{C}_3$ )

$$1 - c_9 Q_{\mathcal{H}}(2\tau)^{1 - \frac{1}{\eta_1}} N^{\eta_1/(1+\eta_1)} e^{-c_{10} Q_{\mathcal{H}}(2\tau)^{1 + \frac{1}{\eta_1}} N^{\frac{\eta_1}{1+\eta_1}}} - \tilde{C}_3 N \exp \left( - (N^{\frac{1}{2} + 2\iota} \tau_0)^\eta / C_1 \right).$$

2. Under conditions (a), (b), and (c)-(ii) of Assumption 2.1, for  $0 < \iota < (1 - 1/\eta_2)/4$ ,

$$\|\hat{f} - f^*\|_{L_2} \leq \max \left\{ N^{-\frac{(1-1/\eta_2)}{4} + \iota}, 2\omega_Q(\mathcal{F} - \mathcal{F}, N, Q_{\mathcal{H}}(2\tau)^{3/2}, Q_{\mathcal{H}}(2\tau)) \right\}, \quad (90)$$

with probability at least (for constants  $c_9, c_{10}, \tilde{C}_4 > 0$ )

$$1 - c_9 Q_{\mathcal{H}}(2\tau)^{1 - \frac{1}{\eta_1}} N^{\eta_1/(1+\eta_1)} e^{-c_{10} Q_{\mathcal{H}}(2\tau)^{1 + \frac{1}{\eta_1}} N^{\eta_1/(1+\eta_1)}} - \tilde{C}_4 \tau_0^{-\frac{2\eta_2}{1+\eta_2}} N^{-\frac{4\iota\eta_2}{1+\eta_2}}. \quad (91)$$



*Proof.* [Proof of Proposition B.2] We first prove **part 1**. We will denote the class  $\mathcal{F} - f^*$  by  $\mathcal{H}$ . From Proposition B.1 it follows that for every  $f \in \mathcal{F}$  which satisfies  $\|f - f^*\|_{L_2} \geq 2\omega_Q$  with probability at least

$$\mathcal{P}_{1,c} = 1 - c_9 Q_{\mathcal{H}}(2\tau)^{1 - \frac{1}{\eta_1}} N^{\eta_1/(1+\eta_1)} e^{-c_{10} Q_{\mathcal{H}}(2\tau)^{1 + \frac{1}{\eta_1}} N^{\eta_1/(1+\eta_1)}},$$

we have

$$\frac{1}{N} \sum_{i=1}^N \ell''(\tilde{\xi}_i)(f - f^*)^2(X_i) \geq c_{16} Q_{\mathcal{H}}(2\tau) \rho(0, t_2) \tau^2 \|f - f^*\|_{L_2}^2.$$

So, with probability at least  $\mathcal{P}_{1,c}$ , for every  $f \in \mathcal{F}$  that satisfies  $\|f - f^*\|_{L_2} \geq 2\omega_Q$ ,

$$P_N \mathcal{L}_f \geq \left( \frac{1}{16N} \sum_{i=1}^N \ell'(\xi_i)(f - f^*)(X_i) - \mathbb{E}[\ell'(\xi)(f - f^*)] \right) + c_{16} Q_{\mathcal{H}}(2\tau) \rho(0, t_2) \tau^2 \|f - f^*\|_{L_2}^2. \quad (92)$$

When  $\|f - f^*\|_{L_2} \geq \mathcal{A}(N) > 2(N\tau_0)^{-1/2}$ , we have  $\log(N\tau_0 \|f - f^*\|_{L_2}^2) \leq 2(N\tau_0 \|f - f^*\|_{L_2}^2)^{(1-\eta)/2} / (1-\eta)$ . Under Conditions (1), (3), and (4) of Assumption 2.1, using Lemma 2.1, we get

$$\begin{aligned} & \mathbb{P} \left( \left| \frac{1}{N} \sum_{i=1}^N \ell'(\xi_i)(f - f^*)(X_i) - \mathbb{E}[\ell'(\xi)(f - f^*)] \right| \geq \tau_0 \|f - f^*\|_{L_2}^2 \right) \\ & \leq N \exp \left( - \frac{(N\tau_0 \|f - f^*\|_{L_2}^2)^\eta}{C_1} \right) + \exp \left( - \frac{N^2 \tau_0^2 \|f - f^*\|_{L_2}^4}{C_2(1 + NV)} \right) \\ & + \exp \left( - \frac{N\tau_0^2 \|f - f^*\|_{L_2}^4}{C_3} \exp \left( \frac{(N\tau_0 \|f - f^*\|_{L_2}^2)^{\eta(1-\eta)}}{C_4(\log(N\tau_0 \|f - f^*\|_{L_2}^2))^\eta} \right) \right) \\ & \leq N \exp \left( - \frac{(N\tau_0 \|f - f^*\|_{L_2}^2)^\eta}{C_1} \right) + \exp \left( - \frac{N^2 \tau_0^2 \|f - f^*\|_{L_2}^4}{C_2(1 + NV)} \right) \\ & + \exp \left( - \frac{N\tau_0^2 \|f - f^*\|_{L_2}^4}{C_3} \exp \left( \frac{(1-\eta)^\eta (N\tau_0 \|f - f^*\|_{L_2}^2)^{\frac{\eta(1-\eta)}{2}}}{C_4 2^\eta} \right) \right) \\ & \leq N \exp \left( - \frac{(N\tau_0 \mathcal{A}(N)^2)^\eta}{C_1} \right) + \exp \left( - \frac{N^2 \tau_0^2 \mathcal{A}(N)^4}{C_2(1 + NV)} \right) \\ & + \exp \left( - \frac{N\tau_0^2 \mathcal{A}(N)^4}{C_3} \exp \left( \frac{(1-\eta)^\eta (N\tau_0 \mathcal{A}(N)^2)^{\frac{\eta(1-\eta)}{2}}}{C_4 2^\eta} \right) \right) \equiv \mathcal{P}_{2,c}, \quad (93) \end{aligned}$$

where

$$V \leq \mathbb{E} \left[ (\ell'(\xi_1)(f - f^*)(X_1))^2 \right] + 4 \sum_{i \geq 0} \mathbb{E} \left[ B_i (\ell'(\xi_1)(f - f^*)(X_1))^2 \right],$$

$\{B_i\}$  is some sequence such that  $B_i \in [0, 1]$  and  $\mathbb{E}[B_i] \leq \beta(i)$ , and  $C_1, C_2, C_3$  are constants which depend on  $c, \eta, \eta_1, \eta_2$ . Observe that,

$$\begin{aligned} V & \leq \mathbb{E} \left[ (\ell'(\xi_1)(f - f^*)(X_1))^2 \right] + 4 \sum_{i \geq 0} \mathbb{E} \left[ B_i (\ell'(\xi_1)(f - f^*)(X_1))^2 \right] \\ & \leq \mathbb{E} \left[ (\ell'(\xi_1)(f - f^*)(X_1))^2 \right] + 4 \sum_{i \geq 0} \sqrt{\mathbb{E}[B_i^2]} \mathbb{E} \left[ (\ell'(\xi_1)(f - f^*)(X_1))^4 \right] \\ & \leq \mathbb{E} \left[ (\ell'(\xi_1)(f - f^*)(X_1))^2 \right] + 4 \sqrt{\mathbb{E} \left[ (\ell'(\xi_1)(f - f^*)(X_1))^4 \right]} \sum_{i \geq 0} \sqrt{\mathbb{E}[B_i]} \\ & \leq \mathbb{E} \left[ (\ell'(\xi_1)(f - f^*)(X_1))^2 \right] + 4 \sqrt{\mathbb{E} \left[ (\ell'(\xi_1)(f - f^*)(X_1))^4 \right]} \sum_{i \geq 0} \sqrt{\beta(i)} \end{aligned}$$

$$\begin{aligned} &\leq \mathbb{E} \left[ (\ell'(\xi_1)(f - f^*)(X_1))^2 \right] + 4 \sqrt{\mathbb{E} \left[ (\ell'(\xi_1)(f - f^*)(X_1))^4 \right]} \sum_{i \geq 0} \exp(-ci^{\eta_1}/2) \\ &\leq 2^{\frac{2}{\eta_2}} + C4^{1+\frac{2}{\eta_2}}. \end{aligned}$$

Combining (92), and (93), with probability at least  $\mathcal{P}_{1,c} - \mathcal{P}_{2,c}$ , for every  $f \in \mathcal{F}$  that satisfies  $\|f - f^*\|_{L_2} \geq \max(2\omega_Q, \mathcal{A}(N))$ , we get

$$P_N L_f \geq -2\tau_0 \|f - f^*\|_{L_2}^2 + c_{16} Q_{\mathcal{H}}(2\tau) \rho(0, t_2) \tau^2 \|f - f^*\|_{L_2}^2.$$

Choosing  $\tau_0 < c_{16} Q_{\mathcal{H}}(2\tau) \rho(0, t_2) \tau^2 / 4$ , we have,  $P_N L_f > 0$ . But the empirical minimizer  $\hat{f}$  satisfies  $P_N L_{\hat{f}} \leq 0$ . This implies, together with choosing  $\mathcal{A}(N) = N^{-1/4+\iota}$ , that with probability at least  $\mathcal{P} = \mathcal{P}_{1,c} - \mathcal{P}_{2,c}$ ,

$$\|\hat{f} - f^*\|_{L_2} \leq \max(2\omega_Q(\mathcal{F} - \mathcal{F}, N, Q_{\mathcal{H}}(2\tau)^{\frac{3}{2}}, Q_{\mathcal{H}}(2\tau)), \mathcal{A}(N)),$$

where

$$\begin{aligned} \mathcal{P} &= 1 - c_9 Q_{\mathcal{H}}(2\tau)^{1-\frac{1}{\eta_1}} N^{\eta_1/(1+\eta_1)} e^{-c_{10} Q_{\mathcal{H}}(2\tau)^{1+\frac{1}{\eta_1}} N^{\eta_1/(1+\eta_1)}} \\ &\quad - N \exp\left(-\frac{(N^{\frac{1}{2}+2\iota} \tau_0)^\eta}{C_1}\right) - \exp\left(-\frac{N^{1+4\iota} \tau_0^2}{C_2(1+NV)}\right) - \exp\left(-\frac{N^{4\iota} \tau_0^2}{C_3} \exp\left((1-\eta)^\eta \frac{(N^{\frac{1}{2}+2\iota} \tau_0)^{\frac{\eta(1-\eta)}{2}}}{C_4 2^\eta}\right)\right). \end{aligned}$$

We now prove **part 2**. When  $\|f - f^*\|_{L_2} \geq \mathcal{A}(N)$ , using Lemma 2.2 we have

$$\begin{aligned} &\mathbb{P}\left(\left|\frac{1}{N} \sum_{i=1}^N \ell'(\xi_i)(f - f^*)(X_i) - \mathbb{E}[\ell'(\xi)(f - f^*)]\right| \geq \tau_0 \|f - f^*\|_{L_2}^2\right) \\ &\leq \frac{2^{\eta_2+3}}{(d_2 \log N \tau_0 \|f - f^*\|_{L_2}^2)^{\frac{1-\eta_2}{\eta_1}}} N(N\tau_0 \|f - f^*\|_{L_2}^2)^{-(1+d_1(\eta_2-1))} + 8N(N\tau_0 \|f - f^*\|_{L_2}^2)^{-(1+d_2c')} \\ &\quad + 2e^{-\frac{(N\tau_0 \|f - f^*\|_{L_2}^2)^{2-2d_1} (d_2 \log(N\tau_0 \|f - f^*\|_{L_2}^2))^{\eta_1}}{9N}} \\ &\leq \frac{2^{\eta_2+3}}{(d_2 \log(N\tau_0 \mathcal{A}(N)^2))^{\frac{1-\eta_2}{\eta_1}}} N(N\tau_0 \mathcal{A}(N)^2)^{-(1+d_1(\eta_2-1))} + 8N(N\tau_0 \mathcal{A}(N)^2)^{-(1+d_2c')} \\ &\quad + 2e^{-\frac{(N\tau_0 \mathcal{A}(N)^2)^{2-2d_1} (d_2 \log(N\tau_0 \mathcal{A}(N)^2))^{\eta_1}}{9N}} \equiv \mathcal{P}_{2,c}. \end{aligned} \tag{94}$$

We will choose  $d_1$  suitably to allow  $\mathcal{A}(N)$  to decrease with  $N$  as fast as possible while ensuring  $\lim_{N \rightarrow \infty} \mathcal{P}_{2,c} \rightarrow 0$ . Combining (66), and (69), with probability at least  $\mathcal{P}_{1,c} - \mathcal{P}_{2,c}$ , for every  $f \in \mathcal{F}$  that satisfies  $\|f - f^*\|_{L_2} \geq \max(2\omega_Q, \mathcal{A}(N))$ , we get

$$P_N L_f \geq -2\tau_0 \|f - f^*\|_{L_2}^2 + c_{16} Q_{\mathcal{H}}(2\tau) \rho(0, t_2) \tau^2 \|f - f^*\|_{L_2}^2.$$

Choosing  $\tau_0 < c_{16} Q_{\mathcal{H}}(2\tau) \rho(0, t_2) \tau^2 / 4$ , we have,  $P_N L_f > 0$ . But the empirical minimizer  $\hat{f}$  satisfies  $P_N L_{\hat{f}} \leq 0$ . This implies, together with choosing  $\mathcal{A}(N) = N^{-(1-1/\eta_2)/4+\iota}$ ,  $d_1 = 1/(1+\eta_2)$ ,  $d_2 = (\eta_2 - 1)/(\eta_2 + 1)$ , and  $\iota < (1 - 1/\eta_2)/4$ , that with probability at least  $\mathcal{P}_c = \mathcal{P}_{1,c} - \mathcal{P}_{2,c}$ ,

$$\|\hat{f} - f^*\|_{L_2} \leq \max(2\omega_Q(\mathcal{F} - \mathcal{F}, N, \zeta_1, \zeta_2), N^{-(1-1/\eta_2)/4+\iota}),$$

where

$$\begin{aligned} \mathcal{P}_c &= 1 - c_9 Q_{\mathcal{H}}(2\tau)^{1-\frac{1}{\eta_1}} N^{\eta_1/(1+\eta_1)} e^{-c_{10} Q_{\mathcal{H}}(2\tau)^{1+\frac{1}{\eta_1}} N^{\eta_1/(1+\eta_1)}} - \frac{2^{\eta_2+3} \tau_0^{-\frac{2\eta_2}{1+\eta_2}}}{\left(\log\left(\tau_0 N^{\frac{1}{2}+\frac{1}{2\eta_2}+2\iota}\right)/2\right)^{\frac{1-\eta_2}{\eta_1}}} N^{-\frac{4\iota\eta_2}{1+\eta_2}} \\ &\quad - 8\tau_0^{-\frac{2\eta_2}{1+\eta_2}} N^{-\frac{4\iota\eta_2}{1+\eta_2}} - 2e^{-\frac{\tau_0^{\frac{2\eta_2}{1+\eta_2}} \left(\log\left(\tau_0 N^{\frac{1}{2}+\frac{1}{2\eta_2}+2\iota}\right)/2\right)^{\eta_1}}{9}} N^{\frac{4\iota\eta_2}{1+\eta_2}}. \end{aligned}$$

■

Note that Proposition B.2 is exactly same as Theorem 3.2 except for the fact one needs  $\ell$  to be strongly convex in  $[-t_0, t_0]$  instead of  $[-t_2, t_2]$  where  $t_2$  is of the order  $\mathcal{O}((2\tau + 1/\sqrt{Q_{\mathcal{H}}(2\tau)})\|\xi\|_{L_2})$ . So now we will show that empirical minimizer  $\hat{f} \in \mathcal{F}$  satisfies  $\|\hat{f} - f^*\|_{L_2} \leq \max(\|\xi\|_{L_2}, 2\omega_Q)$  with high probability. One has the following result from [Men18]:

$$\{h - f^* : h \in \mathcal{F}, \|h - f^*\|_{L_2} \geq R\} \subset \{\lambda(f - f^*) : \lambda \geq 1, f \in \mathcal{F}, \|f - f^*\|_{L_2} = R\}. \quad (95)$$

**Lemma B.10** ([Men18, Lemma 5.6]). *When (87) is true, if  $\|f - f^*\|_{L_2} \geq \max(\|\xi\|_{L_2}, 2\omega_Q)$ , and  $\lambda \geq 1$ , then*

$$\frac{1}{N} \sum_{i=1}^N \ell''(\tilde{\xi}_i)(\lambda(f - f^*))^2(X_i) \geq [\lambda] c_{16} Q_{\mathcal{H}}(2\tau) \rho(0, t_0) \tau^2 \max(\|\xi\|_{L_2}^2, 4\omega_Q^2). \quad (96)$$

**Lemma B.11.** *With probability at least  $1 - \mathcal{P}_{2,c}$  with  $\tau_0 = c_{16} Q_{\mathcal{H}}(2\tau) \rho(0, t_0) \tau^2 / 4$ , we have*

$$\|\hat{f} - f^*\|_{L_2} \leq \max(\|\xi\|_{L_2}, 2\omega_Q).$$

*Proof.* From (93), with probability at least  $1 - \mathcal{P}_{2,c}$  we have,

$$\left| \frac{1}{N} \sum_{i=1}^N \ell'(\xi_i)(f - f^*)(X_i) - \mathbb{E}[\ell'(\xi)(f - f^*)] \right| \leq \tau_0 \|f - f^*\|_{L_2}^2.$$

To make the dependency of  $\mathcal{P}_{2,c}$  on  $\tau_0$  explicit, we use the notation  $\mathcal{P}_{2,c,\tau_0}$  to denote  $\mathcal{P}_{2,c}$  for this proof. If  $\|f - f^*\|_{L_2} \leq \max(\|\xi\|_{L_2}, 2\omega_Q)$ , choosing  $\tau_0 = c_{16} Q_{\mathcal{H}}(2\tau) \rho(0, t_0) \tau^2 / 4$ , with probability at least  $1 - \mathcal{P}_{2,c,c_{16} Q_{\mathcal{H}}(2\tau) \rho(0, t_0) \tau^2 / 4}$ , for the same  $\lambda \geq 1$  as in Lemma B.10, we have,

$$\left| \frac{1}{N} \sum_{i=1}^N \ell'(\xi_i)(\lambda(f - f^*))^2(X_i) - \mathbb{E}[\ell'(\xi)(\lambda(f - f^*))^2] \right| \leq \frac{c_{16} \lambda Q_{\mathcal{H}}(2\tau) \rho(0, t_0) \tau^2}{4} \max(\|\xi\|_{L_2}, 2\omega_Q)^2.$$

If  $\|f - f^*\|_{L_2} = \max(\|\xi\|_{L_2}, 2\omega_Q)$ , and  $\lambda \geq 1$ , we also have

$$\begin{aligned} & \left| \frac{1}{N} \sum_{i=1}^N \ell''(\tilde{\xi}_i)(\lambda(f - f^*))^2(X_i) - \left[ \frac{1}{N} \sum_{i=1}^N \ell'(\xi_i)(\lambda(f - f^*))^2(X_i) - \mathbb{E}[\ell'(\xi)(\lambda(f - f^*))^2] \right] \right| \\ & \geq [\lambda] c_{16} Q_{\mathcal{H}}(2\tau) \rho(0, t_0) \tau^2 \max(\|\xi\|_{L_2}^2, 4\omega_Q^2) - \frac{c_{16} \lambda Q_{\mathcal{H}}(2\tau) \rho(0, t_0) \tau^2}{4} \max(\|\xi\|_{L_2}, 2\omega_Q)^2 \\ & > 0. \end{aligned}$$

So by (95), and Lemma B.10, the empirical minimizer  $\hat{f}$  satisfies,

$$\|\hat{f} - f^*\|_{L_2} \leq \max(\|\xi\|_{L_2}, 2\omega_Q). \quad \blacksquare$$

*Proof.* [Proof of Theorem 3.2] Combining Lemma B.11 with the two parts of Proposition B.2 gives us Theorem 3.2.  $\blacksquare$

**Corollary B.2.** *For the convex ERM procedure, under Assumptions 2.1, with condition (b) replaced by Assumption 3.1 with  $p = 8$ , for some  $0 < \iota < \frac{1}{2}$  and  $r, \mu$  and  $\tau_0$  same as in Theorem 3.2, for sufficiently large  $N$ , we have*

$$\|\hat{f} - f^*\|_{L_2} \leq \max\left(N^{-\frac{1}{2}+\iota}, 2\omega_Q(\mathcal{F} - \mathcal{F}, N, Q_{\mathcal{H}}(2\tau)^{\frac{3}{2}}, Q_{\mathcal{H}}(2\tau))\right) \quad (97)$$

with probability at least (for some constants  $c_9, c_{10}, \tilde{C}_2 > 0$ )

$$1 - c_9 Q_{\mathcal{H}}(2\tau)^{1-\frac{1}{\eta_1}} N^{\eta_1/(1+\eta_1)} e^{-c_{10} Q_{\mathcal{H}}(2\tau)^{1+\frac{1}{\eta_1}} N^{\eta_1/(1+\eta_1)}} - \tilde{C}_2 N \exp(-(N^{2\iota} \tau_0)^\eta / M_1).$$

*Proof.* [Proof of Corollary B.2] The proof is same as Corollary 3.1 and hence we omit it here.  $\blacksquare$

## C Details of Section 4.1

### C.0.1 Verification of Assumption 2.1 for Example 4.1

[WZLL20] showed that the time series given by (19) is stable, strict sense stationary, with  $X_i \sim \text{SW}(\eta_X)$ , for some  $1 > \eta_X > 0$ . As shown in [WLT20],  $\{(X_i, Y_i)\}$  is a strictly stationary sequence; thus, we obtain that is also a  $\beta$ -mixing sequence with exponentially decaying coefficients as in condition (a) of Assumption 2.1. Now we verify the small-ball condition (b) of Assumption 2.1. Let, for any  $\theta = (\theta_1, \dots, \theta_d) \neq 0$ ,  $d_1$  denote the set of non-zero coordinates of  $\theta$ . W.l.o.g lets assume  $T = 1, 2, \dots, d_1$ . Let  $\mathbb{E}[X_i^2] = \sigma_i^2$  and  $\sigma_0 = \min_{1 \leq i \leq d_1} \sigma_i$ . Then  $\mathbb{E}[(\theta^\top X)^2] = \sum_{i=1}^{d_1} \theta_i^2 \sigma_i^2 \geq \sigma_0^2 \|\theta\|_2^2$ . Since  $X_i \sim \text{SW}(\eta_X)$ , we have  $\|\theta_i X_i\|_8 \leq K_1 |\theta_i| 8^{\eta_X}$ . So,

$$\|\theta^\top X\|_8 \leq K_1 \|\theta\|_1 8^{\eta_X} \leq \frac{K_1 \|\theta\|_1 8^{\eta_X}}{\sigma_0 \|\theta\|_2} \|\theta^\top X\|_2 \leq \frac{K_1 \sqrt{d_1} 8^{\eta_X}}{\sigma_0} \|\theta^\top X\|_2. \quad (98)$$

Then using Lemma 4.1 of [Men15], for any  $0 < u < 1$ , we have  $\mathbb{P}(|\theta^\top X| \geq u \|\theta^\top X\|_{L_2}) \geq ((1 - u^2)/(K_1^2 8^{2/\eta_X + 1}))^{4/3}$ . So condition (b) of Assumption 2.1 is true here. This also implies that Assumption 3.1 is true in this case for  $p = 8$ . As an immediate consequence of [VGNA20, Proposition 2.3], we have that condition (c)-(i) in Assumption 2.1 is valid here with  $\eta_2 = \max(\eta_X, \eta_\xi) < 1$ . Since  $1/\eta_2 > 1$ , condition (d) holds true.

**Proposition C.1.** *Consider the learning problem described above. Then with probability at least*

$$1 - \tilde{C}_1 N^r Q_{\mathcal{H}}(2\tau) c^{\frac{1}{2\eta_1}} \exp(-N^{(1-r)\eta_1}) - \tilde{C}_2 N \exp(-(N^{2\iota} \tau_0)^\eta / M_1),$$

we have

$$\|\hat{f} - f^*\|_{L_2} \leq \max \left\{ \frac{2c_3 R \log(ed)^{\frac{1}{\eta}}}{\sqrt{Q_{\mathcal{H}}(2\tau) c^{\frac{1}{2\eta_1}}}} N^{-\frac{1}{2} + \iota}, N^{-\frac{1}{2} + \iota} \right\}.$$

The proof of Proposition C.1 could be found in the Appendix C.0.1.

**Remark 6.** *In a related setting (i.e., assuming  $\theta^*$  is exactly  $s$ -sparse) [WLT20, Corollary 9] presents parameter estimation error which is of the same order as  $\|\hat{f} - f^*\|_{L_2}$  (indeed, for simplicity  $R$  could be thought of being at the same order as  $s$ ) since we assume  $X$  has finite variance. So with slightly better probability guarantee, we recover the same rate ( $\iota$  can be arbitrarily close to 0) as [WLT20, Corollary 9] in the above proposition.*

**Lemma C.1** (Lemma 6.4 of [Men15]). *If  $W = (w_i)_{i=1}^d$  is a random vector on  $\mathbb{R}^d$ , then for every integer  $1 \leq k \leq d$ ,*

$$\mathbb{E} \left[ \sup_{t \in \sqrt{k} B_1^d \cap B_2^d} \langle W, t \rangle \right] \leq 2 \mathbb{E} \left[ \left( \sum_{i=1}^k w_i^{*2} \right)^{\frac{1}{2}} \right],$$

where  $(w_i^*)_{i=1}^d$  is a monotone non-increasing rearrangement of  $(|w_i|)_{i=1}^d$ .

**Lemma C.2.** *Let  $w_1, w_2, \dots, w_d$  are independent copies of a mean-zero, variance 1 random variable  $w \sim \text{SW}(\eta)$ . Then for all  $p \geq 1 \wedge \eta$ ,  $\|w\|_{L_p} \leq K_1 p^{\frac{1}{\eta}}$  for some constant  $K_1 > 0$ . Then for every  $1 \leq k \leq d$ ,*

$$\mathbb{E} \left[ \left( \sum_{i=1}^k w_i^{*2} \right)^{\frac{1}{2}} \right] \leq \sqrt{2k} K_1 (\log(ed))^{1/\eta}.$$

*Proof.* [Proof of Lemma C.2] For  $1 \leq j \leq d$ , and  $p \geq 2$ ,

$$\mathbb{P}(w_j^* \geq t) \leq \binom{d}{j} \mathbb{P}^j(|w| > t) \leq \binom{d}{j} \left( \frac{\|z\|_{L_p}}{t} \right)^{jp}.$$

Setting  $t = u K_1 (\log(ed/j))^{1/\eta}$  and  $p = \log(ed/j)$ , we get

$$\mathbb{P}(w_j^* \geq u K_3) \leq \left( \frac{1}{u} \right)^{j \log(ed/j)}, \quad (99)$$

where  $K_3 = K_1 (\log(ed/j))^{1/\eta}$ . Using (99) we will bound  $\mathbb{E} [w_j^{*2}]$ . For some  $v$ ,

$$\begin{aligned}
\mathbb{E} [w_j^{*2}] &= \int_0^\infty \mathbb{P}(w_j^{*2} > u) du \\
&= \int_0^v \mathbb{P}(w_j^{*2} > u) du + \int_v^\infty \mathbb{P}(w_j^{*2} > u) du \\
&\leq v + \int_0^\infty \mathbb{P}(w_j^{*2} > u+v) du \\
&\leq v + \int_0^\infty \left( \frac{K_3}{\sqrt{u+v}} \right)^{j \log(ed/j)} du \\
&= v - K_5 \left[ \frac{(u+v)^{1-j \log(ed/j)/2}}{j \log(ed/j)/2 - 1} \right]_0^\infty \quad [\text{where } K_5 = K_3^{j \log(ed/j)}] \\
&= v + K_5 \left[ \frac{v^{1-j \log(ed/j)/2}}{j \log(ed/j)/2 - 1} \right].
\end{aligned}$$

To minimize the upper bound on  $\mathbb{E} [w_j^{*2}]$  we choose

$$v = K_5^{\frac{2}{j \log(ed/j)}} = K_3^2 = K_1^2 (\log(ed/j))^{2/\eta}.$$

and get

$$\mathbb{E} [w_j^{*2}] \leq 2K_1^2 (\log(ed/j))^{2/\eta}.$$

For any  $1 \leq k \leq d$ , using Jensen's inequality,

$$\mathbb{E} \left[ \left( \sum_{i=1}^k w_i^{*2} \right)^{\frac{1}{2}} \right] \leq \left( \sum_{i=1}^k \mathbb{E} [w_i^{*2}] \right)^{\frac{1}{2}} \leq \left( \sum_{i=1}^k 2K_1^2 (\log(ed/i))^{2/\eta} \right)^{\frac{1}{2}} \leq \sqrt{2k} K_1 (\log(ed))^{1/\eta}.$$

■

*Proof.* [Proof of Proposition C.1] In order to provide a bound on  $\|\hat{f} - f^*\|_{L_2}$ , we need to compute the order of  $\omega_\mu(\mathcal{F}_R - \mathcal{F}_R, \tau Q_{\mathcal{H}_R}(2\tau)/16)$ . Based on Lemma C.1 and C.2 it is easy to see that, in a similar way to [Men15],

$$\mathbb{E} \left[ \sup_{f \in \mathcal{F}_R \cap s\mathcal{D}_{f^*}} \left| \frac{1}{\sqrt{N}} \sum_{i=1}^N \epsilon_i (f - f^*)(X_i) \right| \right] \leq \begin{cases} c_1 K_1 R (\log ed)^{\frac{1}{\eta}} & (R/s)^2 > d/4, \\ c_2 K_1 s \sqrt{d} & u \leq (R/s)^2 \leq d/4, \end{cases}$$

where  $c_1, c_2$  are constants. Hence, following similar steps as in the proof of [Men15, Lemma 4.6], we have

$$\omega_\mu(\mathcal{F}_R - \mathcal{F}_R, \tau Q_{\mathcal{H}_R}(2\tau)/16) \leq \begin{cases} \frac{c_3 R}{\sqrt{\mu}} \log(ed)^{\frac{1}{\eta}} & \text{if } \mu \leq c_1 d, \\ 0 & \text{if } \mu > c_1 d. \end{cases} \quad (100)$$

From (100), choosing  $r = 1 - 2\iota$  by Theorem 3.1, for sufficiently large  $N$ , we have with probability at least

$$1 - \tilde{C}_1 \frac{N^{1-2\iota} Q_{\mathcal{H}}(2\tau) c^{\frac{1}{\eta_1}}}{4} \exp(-N^{2\iota\eta_1}) - \tilde{C}_2 N \exp\left(-\frac{(N^{2\iota}\tau_0)^\eta}{M_1}\right),$$

we have

$$\|\hat{f} - f^*\|_{L_2} \leq \max\left(\frac{2c_3 R \log(ed)^{\frac{1}{\eta}}}{\sqrt{Q_{\mathcal{H}}(2\tau) c^{\frac{1}{\eta_1}}}} N^{-\frac{1}{2}+\iota}, N^{-\frac{1}{2}+\iota}\right).$$

■

## D Proofs of Section 4.2

**Lemma D.1.** Let  $\{X'_i\}_{i=1}^\mu$  be an *iid* sample with independent coordinates  $X'_{i,j} \sim L(\eta_3, d_j)$  and let  $w$  be a random vector with coordinates

$$w_j = \frac{1}{\sqrt{\mu}} \sum_{i=1}^{\mu} X'_{i,j} \quad j = 1, 2, \dots, d. \quad (101)$$

Then we have

$$\mathbb{P}(|w_j| \geq t) \leq C_3 \left( d_j^{\eta_3 - 2p - 1} \mu^{1 - \frac{\eta_3}{2}} t^{\eta_3 - 2p} + d_j^{-2} t^{-p} \right), \quad (102)$$

for some constant  $C_3 > 0$ .

*Proof.* [Proof of Lemma D.1] Using the symmetry of the distribution of  $w_j$  we can write,

$$\mathbb{P}(|w_j| \geq t) \leq 2\mathbb{P}(w_j \geq t). \quad (103)$$

Setting  $p = \eta_3 - 0.5\iota$ , using Theorem 2.1 of [Che07] we get for any  $t > 0$

$$\mathbb{P}(w_j \geq t) \leq C_p t^{-p} \max \left( r_{\mu,p}(t), (r_{\mu,2}(t))^{\frac{p}{2}} \right) + \exp \left( -\frac{d_j^2 t^2}{16\sigma_{X,2}^2} \right), \quad (104)$$

where

$$C_{1,p} = 2^{2p+1} \max \left( p^p, p^{p/2+1} e^p \int_0^\infty x^{p/2-1} (1-x)^{-p} dx \right),$$

and for any  $k \in \{p, 2\}$ ,

$$r_{\mu,k}(t) = \sum_{i=1}^{\mu} \mathbb{E} \left[ \left| \frac{X'_{i,j}}{\sqrt{\mu}} \right|^k \mathbb{1} \left( \left| \frac{X'_{i,j}}{\sqrt{\mu}} \right| \geq \frac{3\sigma_{X,2}^2}{td_j^2} \right) \right].$$

Now,

$$\begin{aligned} \mathbb{E} \left[ \left| \frac{X'_{i,j}}{\sqrt{\mu}} \right|^p \mathbb{1} \left( \left| \frac{X'_{i,j}}{\sqrt{\mu}} \right| \geq \frac{3\sigma_{X,2}^2}{td_j^2} \right) \right] &= \int_{-\infty}^{\infty} \left| \frac{x}{\sqrt{\mu}} \right|^p \mathbb{1} \left( \left| \frac{x}{\sqrt{\mu}} \right| \geq \frac{3\sigma_{X,2}^2}{td_j^2} \right) \frac{\eta_3 (|x|d_j)^{\eta_3 - 1}}{2(1 + (|x|d_j)^{\eta_3})^2} dx \\ &= \int_{\frac{3\sigma_{X,2}^2 \sqrt{\mu}}{td_j^2}}^{\infty} \left( \frac{x}{\sqrt{\mu}} \right)^p \frac{\eta_3 (xd_j)^{\eta_3 - 1}}{(1 + (xd_j)^{\eta_3})^2} dx \\ &\leq \frac{\eta_3}{d_j^{2p - \eta_3 + 1} \mu^{\frac{\eta_3}{2}} (\eta_3 - p)} \left( \frac{3\sigma_{X,2}^2}{t} \right)^{p - \eta_3} \\ &\leq C_2 d_j^{\eta_3 - 2p - 1} \mu^{-\frac{\eta_3}{2}} t^{\eta_3 - p}, \end{aligned} \quad (105)$$

where  $C_2$  is a constant which depends on  $\eta_3$  and  $p$ . Then

$$r_{\mu,p}(t) \leq C_2 d_j^{\eta_3 - 2p - 1} \mu^{1 - \frac{\eta_3}{2}} t^{\eta_3 - p}.$$

The term  $r_{\mu,2}(t)$  can similarly be bounded as follows:

$$r_{\mu,2}(t) = \sum_{i=1}^{\mu} \mathbb{E} \left[ \left| \frac{X'_{i,j}}{\sqrt{\mu}} \right|^2 \mathbb{1} \left( \left| \frac{X'_{i,j}}{\sqrt{\mu}} \right| \geq \frac{3\sigma_{X,2}^2}{td_j^2} \right) \right] \leq \frac{\sigma_{X,2}^2}{d_j^2}. \quad (106)$$

Using (105), and (106), from (104) we get

$$\mathbb{P}(|w_j| \geq t) \leq C_3 \left( d_j^{\eta_3 - 2p - 1} \mu^{1 - \frac{\eta_3}{2}} t^{\eta_3 - 2p} + d_j^{-2} t^{-p} \right),$$

for some constant  $C_3 > 0$ . ■

**Lemma D.2.** Let  $w_1, w_2, \dots, w_d$  are independent copies of a random variable such that (102) is true for all  $j = 1, 2, \dots, d$ , i.e.,

$$\mathbb{P}(|w_j| \geq t) \leq C_3 \left( d^{\eta_3 - 2p - 1} \mu^{1 - \frac{\eta_3}{2}} t^{\eta_3 - 2p} + d^{-2} t^{-p} \right) \quad j = 1, 2, \dots, d,$$

for  $\eta_3 > 2 + 2\iota$ , and  $p = \eta_3 - 0.5\iota$ . Let  $\{w_j^*\}_{j=1}^d$  be the non-increasing arrangement of  $\{|w_j|\}_{j=1}^d$ . Then for every  $1 \leq k \leq d$ ,

$$\mathbb{E} \left[ \left( \sum_{i=1}^k w_i^{*2} \right)^{\frac{1}{2}} \right] \leq C_6 \sqrt{k} \left( d^{\eta_3/(2p) - 1/2 + 1/p} d_1^{\eta_3/2 - p - \eta_3/p + 3/2 - 2/p} \mu^{1/2 - \eta_3/4} + d^{1/p} d_1^{-2/p} \right),$$

for some constant  $C_6 > 0$  which depends on  $\eta_3$  and  $p$ .

*Proof.* [Proof of Lemma D.2] First note that we have

$$\mathbb{P}(w_1^{*2} \geq t) = \mathbb{P}(w_1^* \geq \sqrt{t}) \leq \sum_{j=1}^d \mathbb{P}(|w_j| \geq \sqrt{t}) \leq C_3 \left( d d_1^{\eta_3 - 2p - 1} \mu^{1 - \eta_3/2} t^{\eta_3/2 - p} + d d_1^{-2} t^{-p/2} \right).$$

Now, using (102), for any  $v > 0$  (to be chosen later), we have

$$\begin{aligned} \mathbb{E}[w_1^{*2}] &= \int_0^\infty \mathbb{P}(w_1^{*2} \geq t) dt \\ &\leq v + \int_0^\infty \mathbb{P}(w_1^{*2} \geq t + v) dt \\ &\leq v + \int_0^\infty C_3 \left( d d_1^{\eta_3 - 2p - 1} \mu^{1 - \eta_3/2} (t + v)^{\eta_3/2 - p} + d d_1^{-2} (t + v)^{-p/2} \right) dt \\ &\leq v + C_4 \left( d d_1^{\eta_3 - 2p - 1} \mu^{1 - \eta_3/2} v^{\eta_3/2 - p + 1} + d d_1^{-2} v^{1 - p/2} \right), \end{aligned}$$

where  $C_4 = C_3 \max(1/(p - 1 - \eta_3/2), 1/(p/2 - 1))$ . Choosing  $v = d^{2/p} d_1^{-4/p}$ , we get

$$\mathbb{E}[w_1^{*2}] \leq C_5 \left( d^{\eta_3/p - 1 + 2/p} d_1^{\eta_3 - 2p - 2\eta_3/p + 3 - 4/p} \mu^{1 - \eta_3/2} + d^{2/p} d_1^{-4/p} \right),$$

where  $C_5 = C_4 + 1$ . Using Jensen's inequality, we have

$$\begin{aligned} \mathbb{E} \left[ \left( \sum_{j=1}^k w_j^{*2} \right)^{\frac{1}{2}} \right] &\leq \left( \sum_{j=1}^k \mathbb{E}[w_j^{*2}] \right)^{\frac{1}{2}} \leq \left( k \mathbb{E}[w_1^{*2}] \right)^{\frac{1}{2}} \\ &\leq C_6 \sqrt{k} \left( d^{\eta_3/(2p) - 1/2 + 1/p} d_1^{\eta_3/2 - p - \eta_3/p + 3/2 - 2/p} \mu^{1/2 - \eta_3/4} + d^{1/p} d_1^{-2/p} \right), \end{aligned}$$

where  $C_6 = \sqrt{C_5}$ , thereby completing the proof.  $\blacksquare$

*Proof.* [Proof of Proposition 4.1] We start by obtaining a bound on the term  $\omega_\mu(\mathcal{F}_R - \mathcal{F}_R, \tau Q_{\mathcal{H}_R}(2\tau)/16)$ . Let  $w$  be a random vector with coordinates

$$w_j = \frac{1}{\sqrt{\mu}} \sum_{i=1}^{\mu} X'_{i,j} \quad j = 1, 2, \dots, d. \quad (107)$$

Let  $\{w_j^*\}_{j=1}^d$  be the non-increasing arrangement of  $\{|w_j|\}_{j=1}^d$ . Then, we have

$$\begin{aligned} &\mathbb{E} \left[ \sup_{f \in \mathcal{F}_R \cap s \mathcal{D}_{f^*}} \left| \frac{1}{\sqrt{\mu}} \sum_{i=1}^{\mu} \epsilon_i (f - f^*)(X'_i) \right| \right] \leq \mathbb{E} \left[ \sup_{t \in B_1^d(2R) \cap B_2^d(s)} \left\langle \frac{1}{\sqrt{\mu}} \sum_{i=1}^{\mu} X'_i, t \right\rangle \right] \\ &= \mathbb{E} \left[ \sup_{t \in B_1^d(2R) \cap B_2^d(s)} \langle w, t \rangle \right] = s \mathbb{E} \left[ \sup_{t \in B_1^d(2R/s) \cap B_2^d(1)} w^\top t \right] \leq 2s \mathbb{E} \left[ \left( \sum_{j=1}^d w_j^{*2} \right)^{\frac{1}{2}} \right]. \end{aligned}$$

If  $(2R/s)^2 < d$ , using Lemma D.2 we get

$$\begin{aligned} \mathbb{E} \left[ \sup_{t \in B_1^d(2R) \cap B_2^d(s)} w^\top t \right] &\leq 4C_6 R \left( d^{\eta_3/(2p)-1/2+1/p} d_1^{\eta_3/2-p-\eta_3/p+3/2-2/p} \mu^{1/2-\eta_3/4} + d^{1/p} d_1^{-2/p} \right) \\ &\leq C_7 R d^{1/p+\iota/8}, \end{aligned}$$

when  $d_1 \geq C'_6$  for some constants  $C'_6, C_7 > 0$ .

If  $(2R/s)^2 \geq d$ ,

$$\mathbb{E} \left[ \sup_{t \in B_1^d(2R) \cap B_2^d(s)} w^\top t \right] \leq 2s\sigma_{X,2}\sqrt{d}.$$

So when  $(2R/s)^2 \geq d$ ,

$$\mathbb{E} \left[ \sup_{f \in \mathcal{F}_R \cap s\mathcal{D}_{f^*}} \left| \frac{1}{\mu} \sum_{i=1}^{\mu} \epsilon_i (f - f^*)(X'_i) \right| \right] \leq \gamma s,$$

for all  $s > 0$ . When  $\mu \leq C_8 d^{1+2/p+\iota/4}$ , we have  $(2R/s) \leq \sqrt{d}$  for

$$s \geq \frac{C_7 R d^{1/p+\iota/8}}{\gamma \sqrt{\mu}}.$$

When  $\mu > C_8 d^{1+2/p+\iota/4}$ , we have  $(2R/s) \geq \sqrt{d}$  for

$$s \leq \frac{C_7 R d^{1/p+\iota/8}}{\gamma \sqrt{\mu}}.$$

Combining the above facts, and choosing  $\mu = \frac{N^r Q_{\mathcal{H}}(2\tau) c^{\frac{1}{\eta_1}}}{4}$ , and  $r = 1 - 2\iota$  we get

$$\omega_\mu(\mathcal{F}_R - \mathcal{F}_R, \tau Q_{\mathcal{H}_R}(2\tau)/16) \leq \begin{cases} \frac{C_9 R}{\tau Q_{\mathcal{H}_R}(2\tau)^{3/2}} d^{1/p+\iota/8} N^{-1/2+\iota} & \text{if } \mu \leq C_8 d^{1+2/p}, \\ 0 & \text{if } \mu > C_8 d^{1+2/p}, \end{cases}$$

where  $C_9 = 32C_7/c^{1/(2\eta_1)}$ . Then using part 2 of Theorem 3.1, we get,

$$\|\hat{f} - f^*\|_{L_2} \leq \max \left\{ N^{-\frac{1}{4}\left(1-\frac{1}{\eta_2}\right)+\iota}, \frac{C_9 R}{\tau Q_{\mathcal{H}_R}(2\tau)^{3/2}} d^{1/p+\iota/8} N^{-1/2+\iota} \right\},$$

with probability given by at least (14). ■

## E Proofs of Section 4.3

*Proof.* [Proof of Proposition 4.2] Since we assumed  $X$  to be Gaussian,  $\mathcal{F}_R$  is a  $L_g$ -subGaussian function class for some constant  $L_g > 0$ . So as shown in Section 6.5.2, we have,

$$\omega_Q(\mathcal{F} - \mathcal{F}, N, \zeta_1, \zeta_2) \leq \begin{cases} \frac{c_3(L_g)R}{\sqrt{N}} \sqrt{\log(ed/N)} & \text{if } N \leq c_1(L_g)d, \\ \frac{c_4(L_g)R}{\sqrt{d}} & \text{if } c_1(L_g)d < N \leq c_2(L_g)d, \\ 0 & \text{if } N > c_2(L_g)d, \end{cases}$$

where  $c_i(L_g), i = 1, 2, 3, 4$  are constants dependent on only  $L_g$ . Then using Corollary B.2, we have

$$\|\hat{f} - f^*\|_{L_2} \leq \max \left( N^{-\frac{1}{2}+\iota}, 2 \frac{c_3(L_g)R}{\sqrt{N}} \sqrt{\log(ed/N)} \right),$$

with probability at least (for some constants  $c_9, c_{10}, \tilde{C}_2 > 0$ )

$$1 - c_9 \epsilon^{1-\frac{1}{\eta_1}} N^{\eta_1/(1+\eta_1)} e^{-c_{10} \epsilon^{1+\frac{1}{\eta_1}} N^{\eta_1/(1+\eta_1)}} - \tilde{C}_2 N \exp(-(N^{2\iota} \tau_0)^\eta / M_1).$$

■



## F A Note on Condition (c) in Assumption 2.1 and $\alpha_N^*(\gamma, \delta)$ in [Men15]

In this section, we discuss the relationship between Condition (c)-(i) of our Assumption 2.1 and the multiplier process based assumption in [Men15, Equation 2.2 and  $\alpha_N^*(\gamma, \delta)$ ]. For simplicity, we consider the following simple model. Let  $\{X_i\}_{i \in \mathbb{Z}^+}$  is an iid sequence of symmetric, zero-mean, random vectors. Let  $\{Y_i\}_{i \in \mathbb{Z}^+}$ ,  $Y_i \in \mathbb{R}$  denote the sequence given by  $Y_i = \theta^{*\top} X_i + \xi_i$ , where  $\theta^* \in B_1^1(R)$  and  $\{\xi_i\}_{i=1}^N$  is an iid sequence and independent of  $X_i$ ,  $\forall i$ , and  $\xi_i \sim N(0, \sigma_1^2)$ . The function class  $\mathcal{F}$  we consider is  $\mathcal{F} := \mathcal{F}_R = \{\langle \theta, \cdot \rangle : \theta \in B_1^d(R)\}$ . Now let us assume  $\frac{1}{N} \sum_{i=1}^N X_i \xi_i$  is heavy-tailed random vector, with the tail lower bounded by  $N \exp(-M(Nt))$ , for some positive increasing function of  $t$ ,  $M(t)$ , i.e.,  $\mathbb{P}\left(\left|N^{-1} \sum_{i=1}^N X_i \xi_i\right| > t\right) \geq M_3 N \exp(-M(Nt))$  for some  $M_3 > 0$ . Specifically setting  $M(t) = t^\eta$ ,  $\eta > 0$ , and  $M(t) = \eta_2 \log t$ ,  $\eta_2 > 2$  one recovers (9) and (10). Now, recall from [Men15] that,

$$\alpha_N^*(\gamma, \delta) := \inf \left\{ s > 0 : \mathbb{P} \left( \sup_{\theta \in B_1^1(2R) \cap B_2^1(s)} \left| \frac{1}{N} \sum_{i=1}^N \xi_i X_i \theta \right| \leq \gamma s^2 \right) \geq 1 - \delta \right\}. \quad (108)$$

Note that, for  $s > 0$ ,

$$\sup_{\theta \in B_1^1(2R) \cap B_2^1(s)} \left| N^{-1} \sum_{i=1}^N \xi_i X_i \theta \right| = \left| N^{-1} \sum_{i=1}^N \xi_i X_i \right| \min(2R, s).$$

We also have,

$$\mathbb{P} \left( \left| \frac{1}{N} \sum_{i=1}^N \xi_i X_i \right| \leq \gamma s^2 / \min(2R, s) \right) \leq 1 - M_3 N \exp(-M(\gamma N s^2 / \min(2R, s))).$$

Then, from (108), when  $s = \alpha_N^*(\gamma, \delta)$ ,

$$\delta \geq N M_3 \exp \left( -M \left( \gamma N \alpha_N^*(\gamma, \delta)^2 / \min(2R, \alpha_N^*(\gamma, \delta)) \right) \right).$$

Hence, if we want a non-trivial bound on the generalization error, we need  $\alpha_N^*(\gamma, \delta)^2 \leq N^{-m_0}$  for some  $m_0 > 0$ . Set  $2R > N^{-m_0/2}$ . When  $M(t) \sim t^{\gamma_2}$ ,  $\gamma_2 > 0$ ,  $\frac{1}{N} \sum_{i=1}^N \xi_i X_i$  has a sub-weibull tail. If it has a polynomially decaying tail, i.e.,  $M(t) = M_4 \log t$  for some constant  $M_4 > 0$ , then

$$\delta \geq N M_3 \exp \left( -M_4 \log \left( \gamma N^{1-m_0/2} \right) \right) = M_3 \gamma^{-M_4} N^{1-(1-\frac{m_0}{2})M_4}.$$

This implies that if  $\frac{1}{N} \sum_{i=1}^N \xi_i X_i$  has a polynomially decaying tail, one gets a polynomial probability statement on the rate using complexity measure  $\alpha_N^*(\gamma, \delta)$ . Note that, since we are considering iid setting, choosing  $m_0 < 1$  would allow  $\alpha_N^*(\gamma, \delta)$  to be of the order of  $N^{-1/2+\iota}$  where  $\iota > 0$  is a small number. Recall that the rates we obtain in Theorem 3.1, and 3.2 are for  $\beta$ -mixing case. Indeed the worse rates are due to the presence of the third terms on the RHS of (9), and (10) – one needs to choose  $\mathcal{A}(N)$  (used in the proofs of Theorem 3.1, and 3.2) suitably so that the third terms on the RHS of (9), and (10) decay to 0 as  $N \rightarrow \infty$ .
